# Supplementary material
Source: publisher figshare collection journal article supplement (https://tandf.figshare.com/ndownloader/files/30563518)
Supplement: Supplementary file 1 [file 30563518]

Archive with 9 entries (9 files):
- Search_protocol_Secondary_literature.docx
- PICO_1_rTMS_r220026.pdf
- PICO_2_ketamin.pdf
- PICO_3_Lysterapi_r221472.pdf
- PICO_5_r220025.pdf
- PICO_6_r217556.pdf
- PICO4[79].pdf
- PICO for each review question_.docx
- Search_protocol_Primary_literature.docx
