# Supplementary material
Source: publisher figshare collection journal article supplement (https://tandf.figshare.com/ndownloader/files/30563518)
Supplement: Supplementary file 1 [file 30563518 › Search_protocol_Secondary_literature.docx]

**Search protocol for the National Clinical Guideline on difficult-to-treat depression. Secondary literature**

**Sources:**

| **DATABASE** | **INTERFACE** |
| --- | --- |
| **Medline** | PubMed |
| **Embase** | OVID |
| **PsycInfo** | OVID |
| **CINAHL** | EBSCO |
| **The Cochrane library** | https://www.cochranelibrary.com/advanced-search |

Refworks has been used for deduplication. Covidence has been used for screening the literature.

[PICO 1 (TMS) 2](#_Toc54356876)

[PubMed 2](#_Toc54356877)

[Embase 4](#_Toc54356878)

[PsycInfo 5](#_Toc54356879)

[CINAHL 5](#_Toc54356880)

[The Cochrane Library 7](#_Toc54356881)

[PICO 2 (ketamine) 7](#_Toc54356882)

[PubMed 7](#_Toc54356883)

[Embase 10](#_Toc54356884)

[PsycInfo 11](#_Toc54356885)

[CINAHL 12](#_Toc54356886)

[The Cochrane library 13](#_Toc54356887)

[PICO 3 (light therapy) 14](#_Toc54356888)

[PubMed 14](#_Toc54356889)

[Embase 16](#_Toc54356890)

[PsycInfo 16](#_Toc54356891)

[CINAHL 17](#_Toc54356892)

[The Cochrane library 19](#_Toc54356893)

[PICO 4 (CBASP) 20](#_Toc54356894)

[PubMed 20](#_Toc54356895)

[Embase 21](#_Toc54356896)

[PsycInfo 22](#_Toc54356897)

[CINAHL 22](#_Toc54356898)

[The Cochrane library 24](#_Toc54356899)

[PICO 5 (rumination) 24](#_Toc54356900)

[PubMed 24](#_Toc54356901)

[Embase 27](#_Toc54356902)

[PsycInfo 28](#_Toc54356903)

[CINAHL 30](#_Toc54356904)

[The Cochrane library 33](#_Toc54356905)

[PICO 6 (cognitive remediation) 35](#_Toc54356906)

[PubMed 35](#_Toc54356907)

[Embase 36](#_Toc54356908)

[PsycInfo 37](#_Toc54356909)

[CINAHL 38](#_Toc54356910)

[The Cochrane library 41](#_Toc54356911)

# PICO 1 (TMS)

## PubMed

Date of search: 31.07.2019

| **Query** | **Items found** |
| --- | --- |
| Search **((((((((((mdd) OR depressive disorder*) OR "depression") OR affective disorder*) OR trd) OR "Mood Disorders"[Mesh]) OR "Depression"[Mesh])) AND ((((("Transcranial Magnetic Stimulation") OR "Trans cranial Magnetic Stimulation") OR "tms") OR "rtms") OR "Transcranial Magnetic Stimulation"[Mesh]))) AND (((((("Systematic Review" [Publication Type] OR systematic[sb] OR "Meta-Analysis" [Publication Type]))) OR ((((meta analy* OR metaanaly* OR "pubmed" OR "medline" OR "embase" OR "cochrane"))) OR (("systematic"[Title/Abstract]) AND (review*[Title/Abstract] OR "study"[Title/Abstract] OR "studies"[Title/Abstract] OR search*[Title/Abstract])))) OR "cochrane database syst rev"[Journal]))** Filters: **Publication date from 2009/01/01 to 2019/12/31; English; Danish; Norwegian; Swedish** | [208](https://www.ncbi.nlm.nih.gov/pubmed/?cmd=HistorySearch&querykey=35) |
| Search **((((((((((mdd) OR depressive disorder*) OR "depression") OR affective disorder*) OR trd) OR "Mood Disorders"[Mesh]) OR "Depression"[Mesh])) AND ((((("Transcranial Magnetic Stimulation") OR "Trans cranial Magnetic Stimulation") OR "tms") OR "rtms") OR "Transcranial Magnetic Stimulation"[Mesh]))) AND (((((("Systematic Review" [Publication Type] OR systematic[sb] OR "Meta-Analysis" [Publication Type]))) OR ((((meta analy* OR metaanaly* OR "pubmed" OR "medline" OR "embase" OR "cochrane"))) OR (("systematic"[Title/Abstract]) AND (review*[Title/Abstract] OR "study"[Title/Abstract] OR "studies"[Title/Abstract] OR search*[Title/Abstract])))) OR "cochrane database syst rev"[Journal]))** Filters: **Publication date from 2009/01/01 to 2019/12/31** | [220](https://www.ncbi.nlm.nih.gov/pubmed/?cmd=HistorySearch&querykey=31) |
| Search **((((((((((mdd) OR depressive disorder*) OR "depression") OR affective disorder*) OR trd) OR "Mood Disorders"[Mesh]) OR "Depression"[Mesh])) AND ((((("Transcranial Magnetic Stimulation") OR "Trans cranial Magnetic Stimulation") OR "tms") OR "rtms") OR "Transcranial Magnetic Stimulation"[Mesh]))) AND (((((("Systematic Review" [Publication Type] OR systematic[sb] OR "Meta-Analysis" [Publication Type]))) OR ((((meta analy* OR metaanaly* OR "pubmed" OR "medline" OR "embase" OR "cochrane"))) OR (("systematic"[Title/Abstract]) AND (review*[Title/Abstract] OR "study"[Title/Abstract] OR "studies"[Title/Abstract] OR search*[Title/Abstract])))) OR "cochrane database syst rev"[Journal]))** | [272](https://www.ncbi.nlm.nih.gov/pubmed/?cmd=HistorySearch&querykey=30) |
| Search **((((("Systematic Review" [Publication Type] OR systematic[sb] OR "Meta-Analysis" [Publication Type]))) OR ((((meta analy* OR metaanaly* OR "pubmed" OR "medline" OR "embase" OR "cochrane"))) OR (("systematic"[Title/Abstract]) AND (review*[Title/Abstract] OR "study"[Title/Abstract] OR "studies"[Title/Abstract] OR search*[Title/Abstract])))) OR "cochrane database syst rev"[Journal])** | [443944](https://www.ncbi.nlm.nih.gov/pubmed/?cmd=HistorySearch&querykey=29) |
| Search **((((((((mdd) OR depressive disorder*) OR "depression") OR affective disorder*) OR trd) OR "Mood Disorders"[Mesh]) OR "Depression"[Mesh])) AND ((((("Transcranial Magnetic Stimulation") OR "Trans cranial Magnetic Stimulation") OR "tms") OR "rtms") OR "Transcranial Magnetic Stimulation"[Mesh])** | [2480](https://www.ncbi.nlm.nih.gov/pubmed/?cmd=HistorySearch&querykey=28) |
| Search **(((("Transcranial Magnetic Stimulation") OR "Trans cranial Magnetic Stimulation") OR "tms") OR "rtms") OR "Transcranial Magnetic Stimulation"[Mesh]** | [20359](https://www.ncbi.nlm.nih.gov/pubmed/?cmd=HistorySearch&querykey=27) |
| Search **"Transcranial Magnetic Stimulation"[Mesh]** | [10559](https://www.ncbi.nlm.nih.gov/pubmed/?cmd=HistorySearch&querykey=18) |
| Search **"rtms"** | [4134](https://www.ncbi.nlm.nih.gov/pubmed/?cmd=HistorySearch&querykey=17) |
| Search **"tms"** | [11387](https://www.ncbi.nlm.nih.gov/pubmed/?cmd=HistorySearch&querykey=16) |
| Search **"Trans cranial Magnetic Stimulation"** | [35](https://www.ncbi.nlm.nih.gov/pubmed/?cmd=HistorySearch&querykey=15) |
| Search **"Transcranial Magnetic Stimulation"** | [15693](https://www.ncbi.nlm.nih.gov/pubmed/?cmd=HistorySearch&querykey=14) |
| Search **((((((mdd) OR depressive disorder*) OR "depression") OR affective disorder*) OR trd) OR "Mood Disorders"[Mesh]) OR "Depression"[Mesh]** | [431410](https://www.ncbi.nlm.nih.gov/pubmed/?cmd=HistorySearch&querykey=13) |
| Search **"Depression"[Mesh]** | [110593](https://www.ncbi.nlm.nih.gov/pubmed/?cmd=HistorySearch&querykey=12) |
| Search **"Mood Disorders"[Mesh]** | [116997](https://www.ncbi.nlm.nih.gov/pubmed/?cmd=HistorySearch&querykey=11) |
| Search **trd** | [1409](https://www.ncbi.nlm.nih.gov/pubmed/?cmd=HistorySearch&querykey=10) |
| Search **affective disorder*** | [19277](https://www.ncbi.nlm.nih.gov/pubmed/?cmd=HistorySearch&querykey=9) |
| Search **"depression"** | [379216](https://www.ncbi.nlm.nih.gov/pubmed/?cmd=HistorySearch&querykey=8) |
| Search **depressive disorder*** | [111500](https://www.ncbi.nlm.nih.gov/pubmed/?cmd=HistorySearch&querykey=7) |
| Search **mdd** | [11881](https://www.ncbi.nlm.nih.gov/pubmed/?cmd=HistorySearch&querykey=6) |

## Embase

Date of search: 31.07.2019

| **#** | **Searches** | **Results** |
| --- | --- | --- |
| 1 | mdd.mp. | 17896 |
| 2 | depressive disorder*.mp. | 50219 |
| 3 | depression.mp. | 634035 |
| 4 | affective disorder*.mp. | 24395 |
| 5 | trd.mp. | 2266 |
| 6 | exp mood disorder/ | 485312 |
| 7 | 1 or 2 or 3 or 4 or 5 or 6 | 713137 |
| 8 | Transcranial Magnetic Stimulation.mp. | 24494 |
| 9 | Trans cranial Magnetic Stimulation.mp. | 57 |
| 10 | tms.mp. | 16992 |
| 11 | rtms.mp. | 6773 |
| 12 | exp transcranial magnetic stimulation/ | 22621 |
| 13 | 8 or 9 or 10 or 11 or 12 | 31609 |
| 14 | 7 and 13 | 5427 |
| 15 | limit 14 to (meta analysis or "systematic review") | 354 |
| 16 | ((systematic adj3 (review* or study or studies or search*)) or meta analy* or meta-analy* or metaanaly*).ti,ab,kw. | 346996 |
| 17 | Cochrane.jx. | 20506 |
| 18 | 16 or 17 | 361384 |
| 19 | 14 and 18 | 390 |
| 20 | 15 or 19 | 471 |
| 21 | limit 20 to yr="2009 - 2019" | 397 |
| 22 | limit 21 to (danish or english or norwegian or swedish) | 382 |

## PsycInfo

Date of search: 31.07.2019

| **#** | **Searches** | **Results** |
| --- | --- | --- |
| 1 | mdd.mp. | 9702 |
| 2 | depressive disorder*.mp. | 74365 |
| 3 | depression.mp. | 312469 |
| 4 | affective disorder*.mp. | 33361 |
| 5 | trd.mp. | 671 |
| 6 | exp affective disorders/ | 135831 |
| 7 | "depression (emotion)"/ | 25005 |
| 8 | 1 or 2 or 3 or 4 or 5 or 6 or 7 | 340201 |
| 9 | Transcranial Magnetic Stimulation.mp. | 10267 |
| 10 | Trans cranial Magnetic Stimulation.mp. | 16 |
| 11 | tms.mp. | 4951 |
| 12 | rtms.mp. | 2858 |
| 13 | transcranial magnetic stimulation/ | 7816 |
| 14 | 9 or 10 or 11 or 12 or 13 | 10884 |
| 15 | 8 and 14 | 2284 |
| 16 | limit 15 to ("0830 systematic review" or 1200 meta analysis) | 124 |
| 17 | (((systematic or method* or rapid or integrative) adj3 (review* or overview* or study or studies or search* or approach*)) or meta analy* or meta-analy* or metaanaly*).ti,ab,id. | 177993 |
| 18 | (pooled adj1 (data or analys*)).ti,ab. | 1780 |
| 19 | 17 or 18 | 179252 |
| 20 | 15 and 19 | 277 |
| 21 | 16 or 20 | 284 |
| 22 | limit 21 to yr="2009 - 2019" | 235 |
| 23 | limit 22 to (danish or english or norwegian or swedish) | 212 |

## CINAHL

Date of search: 31.07.2019

| **#** | **Query** | **Limiters/Expanders** | **Results** |
| --- | --- | --- | --- |
| S24 | S14 AND S21 | Limiters - Published Date: 20090101-20191231; Language: Danish, English, Norwegian, Swedish  Search modes - Boolean/Phrase | 67 |
| S23 | S14 AND S21 | Limiters - Published Date: 20090101-20191231  Search modes - Boolean/Phrase | 68 |
| S22 | S14 AND S21 | Search modes - Boolean/Phrase | 80 |
| S21 | S15 OR S18 OR S19 OR S20 | Search modes - Boolean/Phrase | 303,667 |
| S20 | (pooled N1 (data or analys*)) | Search modes - Boolean/Phrase | 7,532 |
| S19 | (((systematic or method* or rapid or integrative) N3 (review* or overview* or study or studies or search* or approach*)) or meta analy* or meta-analy* or metaanaly*) | Search modes - Boolean/Phrase | 293,329 |
| S18 | S16 OR S17 | Search modes - Boolean/Phrase | 92,020 |
| S17 | (MH "Meta Analysis") | Search modes - Boolean/Phrase | 39,019 |
| S16 | (MH "Systematic Review") | Search modes - Boolean/Phrase | 72,385 |
| S15 | PT (Systematic Review or Meta Analysis) | Search modes - Boolean/Phrase | 86,899 |
| S14 | S7 AND S13 | Search modes - Boolean/Phrase | 569 |
| S13 | S8 OR S9 OR S10 OR S11 OR S12 | Search modes - Boolean/Phrase | 3,027 |
| S12 | (MH "Transcranial Magnetic Stimulation") | Search modes - Boolean/Phrase | 903 |
| S11 | rtms | Search modes - Boolean/Phrase | 932 |
| S10 | tms | Search modes - Boolean/Phrase | 1,022 |
| S9 | "Trans cranial Magnetic Stimulation" | Search modes - Boolean/Phrase | 7 |
| S8 | "Transcranial Magnetic Stimulation" | Search modes - Boolean/Phrase | 2,509 |
| S7 | S1 OR S2 OR S3 OR S4 OR S5 OR S6 | Search modes - Boolean/Phrase | 152,365 |
| S6 | (MH "Affective Disorders+") | Search modes - Boolean/Phrase | 103,643 |
| S5 | trd | Search modes - Boolean/Phrase | 260 |
| S4 | "affective disorder*" | Search modes - Boolean/Phrase | 9,083 |
| S3 | depression | Search modes - Boolean/Phrase | 144,662 |
| S2 | "depressive disorder*" | Search modes - Boolean/Phrase | 9,085 |
| S1 | mdd | Search modes - Boolean/Phrase | 3,094 |

## The Cochrane Library

Date of search: 31.07.2019


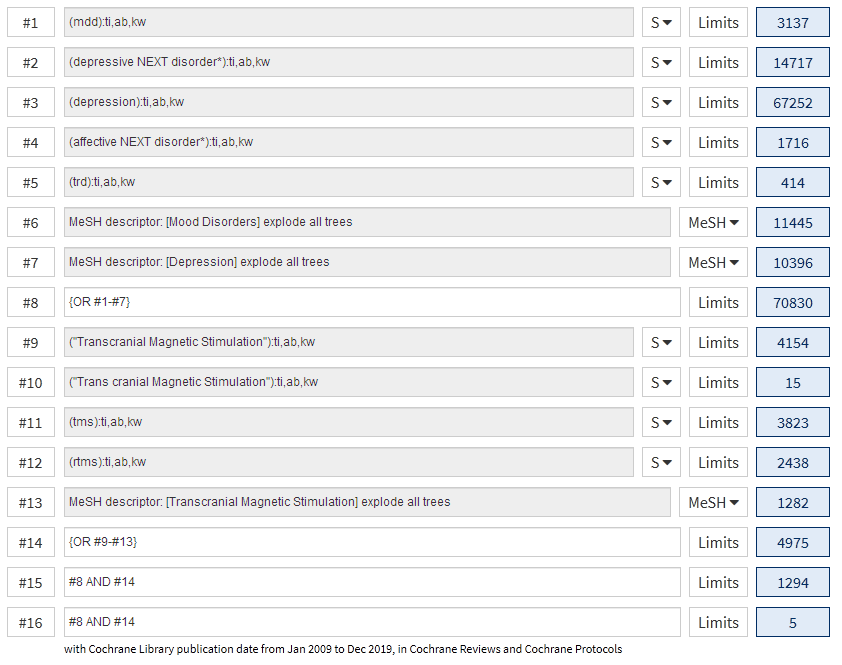


**References in total: 874. After deduplication: 513.**

# PICO 2 (ketamine)

## PubMed

Date of search: 07.08.2019

| **Query** | **Items found** |
| --- | --- |
| Search **((((((("Systematic Review" [Publication Type] OR systematic[sb] OR "Meta-Analysis" [Publication Type]))) OR ((((meta analy* OR metaanaly* OR "pubmed" OR "medline" OR "embase" OR "cochrane"))) OR (("systematic"[Title/Abstract]) AND (review*[Title/Abstract] OR "study"[Title/Abstract] OR "studies"[Title/Abstract] OR search*[Title/Abstract])))) OR "cochrane database syst rev"[Journal]))) AND ((((((((((((((((("Ketamine") OR "esketamine") OR "NMDAR-antagonist") OR "NMDAR-antagonists") OR "NMDA-R antagonist") OR "NMDA-R antagonists") OR "NMDA-antagonist") OR "NMDA-antagonists") OR "N-methyl-d-aspartate antagonist") OR "N-methyl-d-aspartate antagonists") OR "N-methyl-d-aspartate receptor antagonist") OR "N-methyl-d-aspartate receptor antagonists") OR Arketamine) OR "Ketamine"[Mesh]) OR "Esketamine" [Supplementary Concept])) AND (((((((mdd) OR depressive disorder*) OR "depression") OR affective disorder*) OR trd) OR "Mood Disorders"[Mesh]) OR "Depression"[Mesh]))** Filters: **Publication date from 2009/01/01 to 2019/12/31; English; Danish; Norwegian; Swedish** | [105](https://www.ncbi.nlm.nih.gov/pubmed/?cmd=HistorySearch&querykey=34) |
| Search **((((((("Systematic Review" [Publication Type] OR systematic[sb] OR "Meta-Analysis" [Publication Type]))) OR ((((meta analy* OR metaanaly* OR "pubmed" OR "medline" OR "embase" OR "cochrane"))) OR (("systematic"[Title/Abstract]) AND (review*[Title/Abstract] OR "study"[Title/Abstract] OR "studies"[Title/Abstract] OR search*[Title/Abstract])))) OR "cochrane database syst rev"[Journal]))) AND ((((((((((((((((("Ketamine") OR "esketamine") OR "NMDAR-antagonist") OR "NMDAR-antagonists") OR "NMDA-R antagonist") OR "NMDA-R antagonists") OR "NMDA-antagonist") OR "NMDA-antagonists") OR "N-methyl-d-aspartate antagonist") OR "N-methyl-d-aspartate antagonists") OR "N-methyl-d-aspartate receptor antagonist") OR "N-methyl-d-aspartate receptor antagonists") OR Arketamine) OR "Ketamine"[Mesh]) OR "Esketamine" [Supplementary Concept])) AND (((((((mdd) OR depressive disorder*) OR "depression") OR affective disorder*) OR trd) OR "Mood Disorders"[Mesh]) OR "Depression"[Mesh]))** Filters: **Publication date from 2009/01/01 to 2019/12/31** | [109](https://www.ncbi.nlm.nih.gov/pubmed/?cmd=HistorySearch&querykey=30) |
| Search **((((((("Systematic Review" [Publication Type] OR systematic[sb] OR "Meta-Analysis" [Publication Type]))) OR ((((meta analy* OR metaanaly* OR "pubmed" OR "medline" OR "embase" OR "cochrane"))) OR (("systematic"[Title/Abstract]) AND (review*[Title/Abstract] OR "study"[Title/Abstract] OR "studies"[Title/Abstract] OR search*[Title/Abstract])))) OR "cochrane database syst rev"[Journal]))) AND ((((((((((((((((("Ketamine") OR "esketamine") OR "NMDAR-antagonist") OR "NMDAR-antagonists") OR "NMDA-R antagonist") OR "NMDA-R antagonists") OR "NMDA-antagonist") OR "NMDA-antagonists") OR "N-methyl-d-aspartate antagonist") OR "N-methyl-d-aspartate antagonists") OR "N-methyl-d-aspartate receptor antagonist") OR "N-methyl-d-aspartate receptor antagonists") OR Arketamine) OR "Ketamine"[Mesh]) OR "Esketamine" [Supplementary Concept])) AND (((((((mdd) OR depressive disorder*) OR "depression") OR affective disorder*) OR trd) OR "Mood Disorders"[Mesh]) OR "Depression"[Mesh]))** | [110](https://www.ncbi.nlm.nih.gov/pubmed/?cmd=HistorySearch&querykey=29) |
| Search **((((("Systematic Review" [Publication Type] OR systematic[sb] OR "Meta-Analysis" [Publication Type]))) OR ((((meta analy* OR metaanaly* OR "pubmed" OR "medline" OR "embase" OR "cochrane"))) OR (("systematic"[Title/Abstract]) AND (review*[Title/Abstract] OR "study"[Title/Abstract] OR "studies"[Title/Abstract] OR search*[Title/Abstract])))) OR "cochrane database syst rev"[Journal])** | [445078](https://www.ncbi.nlm.nih.gov/pubmed/?cmd=HistorySearch&querykey=28) |
| Search **(((((((((((((((("Ketamine") OR "esketamine") OR "NMDAR-antagonist") OR "NMDAR-antagonists") OR "NMDA-R antagonist") OR "NMDA-R antagonists") OR "NMDA-antagonist") OR "NMDA-antagonists") OR "N-methyl-d-aspartate antagonist") OR "N-methyl-d-aspartate antagonists") OR "N-methyl-d-aspartate receptor antagonist") OR "N-methyl-d-aspartate receptor antagonists") OR Arketamine) OR "Ketamine"[Mesh]) OR "Esketamine" [Supplementary Concept])) AND (((((((mdd) OR depressive disorder*) OR "depression") OR affective disorder*) OR trd) OR "Mood Disorders"[Mesh]) OR "Depression"[Mesh])** | [2560](https://www.ncbi.nlm.nih.gov/pubmed/?cmd=HistorySearch&querykey=27) |
| Search **(((((((((((((("Ketamine") OR "esketamine") OR "NMDAR-antagonist") OR "NMDAR-antagonists") OR "NMDA-R antagonist") OR "NMDA-R antagonists") OR "NMDA-antagonist") OR "NMDA-antagonists") OR "N-methyl-d-aspartate antagonist") OR "N-methyl-d-aspartate antagonists") OR "N-methyl-d-aspartate receptor antagonist") OR "N-methyl-d-aspartate receptor antagonists") OR Arketamine) OR "Ketamine"[Mesh]) OR "Esketamine" [Supplementary Concept]** | [24652](https://www.ncbi.nlm.nih.gov/pubmed/?cmd=HistorySearch&querykey=26) |
| Search **"Esketamine" [Supplementary Concept]** | [6](https://www.ncbi.nlm.nih.gov/pubmed/?cmd=HistorySearch&querykey=25) |
| Search **"Ketamine"[Mesh]** | [11823](https://www.ncbi.nlm.nih.gov/pubmed/?cmd=HistorySearch&querykey=24) |
| Search **Arketamine** | [3](https://www.ncbi.nlm.nih.gov/pubmed/?cmd=HistorySearch&querykey=23) |
| Search **"N-methyl-d-aspartate receptor antagonists"** | [385](https://www.ncbi.nlm.nih.gov/pubmed/?cmd=HistorySearch&querykey=20) |
| Search **"N-methyl-d-aspartate receptor antagonist"** | [1142](https://www.ncbi.nlm.nih.gov/pubmed/?cmd=HistorySearch&querykey=19) |
| Search **"N-methyl-d-aspartate antagonists"** | [226](https://www.ncbi.nlm.nih.gov/pubmed/?cmd=HistorySearch&querykey=22) |
| Search **"N-methyl-d-aspartate antagonist"** | [473](https://www.ncbi.nlm.nih.gov/pubmed/?cmd=HistorySearch&querykey=21) |
| Search **"NMDA-antagonists"** | [1646](https://www.ncbi.nlm.nih.gov/pubmed/?cmd=HistorySearch&querykey=18) |
| Search **"NMDA-antagonist"** | [2721](https://www.ncbi.nlm.nih.gov/pubmed/?cmd=HistorySearch&querykey=17) |
| Search **"NMDA-R antagonists"** | [40](https://www.ncbi.nlm.nih.gov/pubmed/?cmd=HistorySearch&querykey=16) |
| Search **"NMDA-R antagonist"** | [55](https://www.ncbi.nlm.nih.gov/pubmed/?cmd=HistorySearch&querykey=15) |
| Search **"NMDAR-antagonists"** | [344](https://www.ncbi.nlm.nih.gov/pubmed/?cmd=HistorySearch&querykey=14) |
| Search **"NMDAR-antagonist"** | [668](https://www.ncbi.nlm.nih.gov/pubmed/?cmd=HistorySearch&querykey=13) |
| Search **"esketamine"** | [79](https://www.ncbi.nlm.nih.gov/pubmed/?cmd=HistorySearch&querykey=12) |
| Search **"Ketamine"** | [18918](https://www.ncbi.nlm.nih.gov/pubmed/?cmd=HistorySearch&querykey=11) |
| Search **((((((mdd) OR depressive disorder*) OR "depression") OR affective disorder*) OR trd) OR "Mood Disorders"[Mesh]) OR "Depression"[Mesh]** | [431892](https://www.ncbi.nlm.nih.gov/pubmed/?cmd=HistorySearch&querykey=10) |
| Search **"Depression"[Mesh]** | [110709](https://www.ncbi.nlm.nih.gov/pubmed/?cmd=HistorySearch&querykey=9) |
| Search **"Mood Disorders"[Mesh]** | [117082](https://www.ncbi.nlm.nih.gov/pubmed/?cmd=HistorySearch&querykey=8) |
| Search **trd** | [1413](https://www.ncbi.nlm.nih.gov/pubmed/?cmd=HistorySearch&querykey=5) |
| Search **affective disorder*** | [19288](https://www.ncbi.nlm.nih.gov/pubmed/?cmd=HistorySearch&querykey=4) |
| Search **"depression"** | [379663](https://www.ncbi.nlm.nih.gov/pubmed/?cmd=HistorySearch&querykey=3) |
| Search **depressive disorder*** | [111591](https://www.ncbi.nlm.nih.gov/pubmed/?cmd=HistorySearch&querykey=2) |
| Search **mdd** | [11903](https://www.ncbi.nlm.nih.gov/pubmed/?cmd=HistorySearch&querykey=1) |

## Embase

Date of search: 07.08.2019

| **#** | **Searches** | **Results** |
| --- | --- | --- |
| 1 | mdd.mp. | 17994 |
| 2 | depressive disorder*.mp. | 50390 |
| 3 | depression.mp. | 635394 |
| 4 | affective disorder*.mp. | 24440 |
| 5 | trd.mp. | 2278 |
| 6 | exp mood disorder/ | 486399 |
| 7 | 1 or 2 or 3 or 4 or 5 or 6 | 714702 |
| 8 | ketamine.mp. | 39976 |
| 9 | esketamine.mp. | 426 |
| 10 | NMDAR-antagonist.mp. | 913 |
| 11 | NMDAR-antagonists.mp. | 489 |
| 12 | NMDA-R antagonist.mp. | 96 |
| 13 | NMDA-R antagonists.mp. | 75 |
| 14 | NMDA-antagonist.mp. | 3446 |
| 15 | NMDA-antagonists.mp. | 2150 |
| 16 | ketamine/ | 36484 |
| 17 | esketamine/ | 417 |
| 18 | arketamine.mp. | 5 |
| 19 | n methyl dextro aspartic acid receptor blocking agent/ | 14040 |
| 20 | N-methyl-d-aspartate antagonist.mp. | 546 |
| 21 | N-methyl-d-aspartate antagonists.mp. | 277 |
| 22 | N-methyl-d-aspartate receptor antagonist.mp. | 1279 |
| 23 | N-methyl-d-aspartate receptor antagonists.mp. | 427 |
| 24 | 8 or 9 or 10 or 11 or 12 or 13 or 14 or 15 or 16 or 17 or 18 or 19 or 20 or 21 or 22 or 23 | 55491 |
| 25 | 7 and 24 | 7499 |
| 26 | limit 25 to (meta analysis or "systematic review") | 265 |
| 27 | ((systematic adj3 (review* or study or studies or search*)) or meta analy* or meta-analy* or metaanaly*).ti,ab,kw. | 348736 |
| 28 | Cochrane.jx. | 20526 |
| 29 | 27 or 28 | 363140 |
| 30 | 25 and 29 | 211 |
| 31 | 26 or 30 | 331 |
| 32 | 31 not Conference Abstract.pt. | 294 |
| 33 | limit 32 to yr="2009 - 2019" | 209 |
| 34 | limit 33 to (danish or english or norwegian or swedish) | 204 |

## PsycInfo

Date of search: 07.08.2019

| **#** | **Searches** | **Results** |
| --- | --- | --- |
| 1 | mdd.mp. | 9750 |
| 2 | depressive disorder*.mp. | 74448 |
| 3 | depression.mp. | 312976 |
| 4 | affective disorder*.mp. | 33407 |
| 5 | trd.mp. | 674 |
| 6 | exp affective disorders/ | 136081 |
| 7 | "depression (emotion)"/ | 25021 |
| 8 | 1 or 2 or 3 or 4 or 5 or 6 or 7 | 340729 |
| 9 | ketamine.mp. | 3367 |
| 10 | esketamine.mp. | 23 |
| 11 | NMDAR-antagonist.mp. | 351 |
| 12 | NMDAR-antagonists.mp. | 189 |
| 13 | NMDA-R antagonist.mp. | 31 |
| 14 | NMDA-R antagonists.mp. | 26 |
| 15 | NMDA-antagonist.mp. | 1042 |
| 16 | NMDA-antagonists.mp. | 618 |
| 17 | arketamine.mp. | 2 |
| 18 | ketamine/ | 1880 |
| 19 | N-methyl-d-aspartate antagonist.mp. | 158 |
| 20 | N-methyl-d-aspartate antagonists.mp. | 97 |
| 21 | N-methyl-d-aspartate receptor antagonist.mp. | 338 |
| 22 | N-methyl-d-aspartate receptor antagonists.mp. | 143 |
| 23 | 9 or 10 or 11 or 12 or 13 or 14 or 15 or 16 or 17 or 18 or 19 or 20 or 21 or 22 | 5322 |
| 24 | 8 and 23 | 1211 |
| 25 | limit 24 to ("0830 systematic review" or 1200 meta analysis) | 29 |
| 26 | (((systematic or method* or rapid or integrative) adj3 (review* or overview* or study or studies or search* or approach*)) or meta analy* or meta-analy* or metaanaly*).ti,ab,id. | 178410 |
| 27 | (pooled adj1 (data or analys*)).ti,ab. | 1785 |
| 28 | 26 or 27 | 179671 |
| 29 | 24 and 28 | 87 |
| 30 | 25 or 29 | 88 |
| 31 | limit 30 to yr="2009 - 2019" | 86 |
| 32 | limit 31 to (danish or english or norwegian or swedish) | 77 |

## CINAHL

Date of search: 07.08.2019

| S32 | S23 AND S29 | Limiters - Published Date: 20090101-20191231; Language: Danish, English, Norwegian, Swedish  Search modes - Boolean/Phrase | 52 |
| --- | --- | --- | --- |
| S31 | S23 AND S29 | Limiters - Published Date: 20090101-20191231  Search modes - Boolean/Phrase | 52 |
| S30 | S23 AND S29 | Search modes - Boolean/Phrase | 52 |
| S29 | S24 OR S25 OR S26 OR S27 OR S28 | Search modes - Boolean/Phrase | 304,585 |
| S28 | (pooled N1 (data or analys*)) | Search modes - Boolean/Phrase | 7,559 |
| S27 | (((systematic or method* or rapid or integrative) N3 (review* or overview* or study or studies or search* or approach*)) or meta analy* or meta-analy* or metaanaly*) | Search modes - Boolean/Phrase | 294,233 |
| S26 | (MH "Meta Analysis") | Search modes - Boolean/Phrase | 39,146 |
| S25 | (MH "Systematic Review") | Search modes - Boolean/Phrase | 72,616 |
| S24 | PT (Systematic Review or Meta Analysis) | Search modes - Boolean/Phrase | 86,924 |
| S23 | S7 AND S22 | Search modes - Boolean/Phrase | 578 |
| S22 | S8 OR S9 OR S10 OR S11 OR S12 OR S13 OR S14 OR S15 OR S16 OR S17 OR S18 OR S19 OR S20 OR S21 | Search modes - Boolean/Phrase | 4,248 |
| S21 | "N-methyl-d-aspartate receptor antagonists" | Search modes - Boolean/Phrase | 54 |
| S20 | "N-methyl-d-aspartate receptor antagonist" | Search modes - Boolean/Phrase | 125 |
| S19 | "N-methyl-d-aspartate antagonists" | Search modes - Boolean/Phrase | 22 |
| S18 | "N-methyl-d-aspartate antagonist" | Search modes - Boolean/Phrase | 46 |
| S17 | (MH "Ketamine") | Search modes - Boolean/Phrase | 2,844 |
| S16 | "NMDA-antagonists" | Search modes - Boolean/Phrase | 61 |
| S15 | "NMDA-antagonist" | Search modes - Boolean/Phrase | 90 |
| S14 | "NMDA-R antagonists" | Search modes - Boolean/Phrase | 4 |
| S13 | "NMDA-R antagonist" | Search modes - Boolean/Phrase | 4 |
| S12 | "NMDAR-antagonists" | Search modes - Boolean/Phrase | 20 |
| S11 | "NMDAR-antagonist" | Search modes - Boolean/Phrase | 42 |
| S10 | arketamine | Search modes - Boolean/Phrase | 1 |
| S9 | esketamine | Search modes - Boolean/Phrase | 38 |
| S8 | ketamine | Search modes - Boolean/Phrase | 3,935 |
| S7 | S1 OR S2 OR S3 OR S4 OR S5 OR S6 | Search modes - Boolean/Phrase | 152,710 |
| S6 | (MH "Affective Disorders+") | Search modes - Boolean/Phrase | 103,852 |
| S5 | trd | Search modes - Boolean/Phrase | 262 |
| S4 | "affective disorder*" | Search modes - Boolean/Phrase | 9,098 |
| S3 | depression | Search modes - Boolean/Phrase | 144,995 |
| S2 | "depressive disorder*" | Search modes - Boolean/Phrase | 9,104 |
| S1 | mdd | Search modes - Boolean/Phrase | 3,102 |

## The Cochrane library

Date of search: 07.08.2019


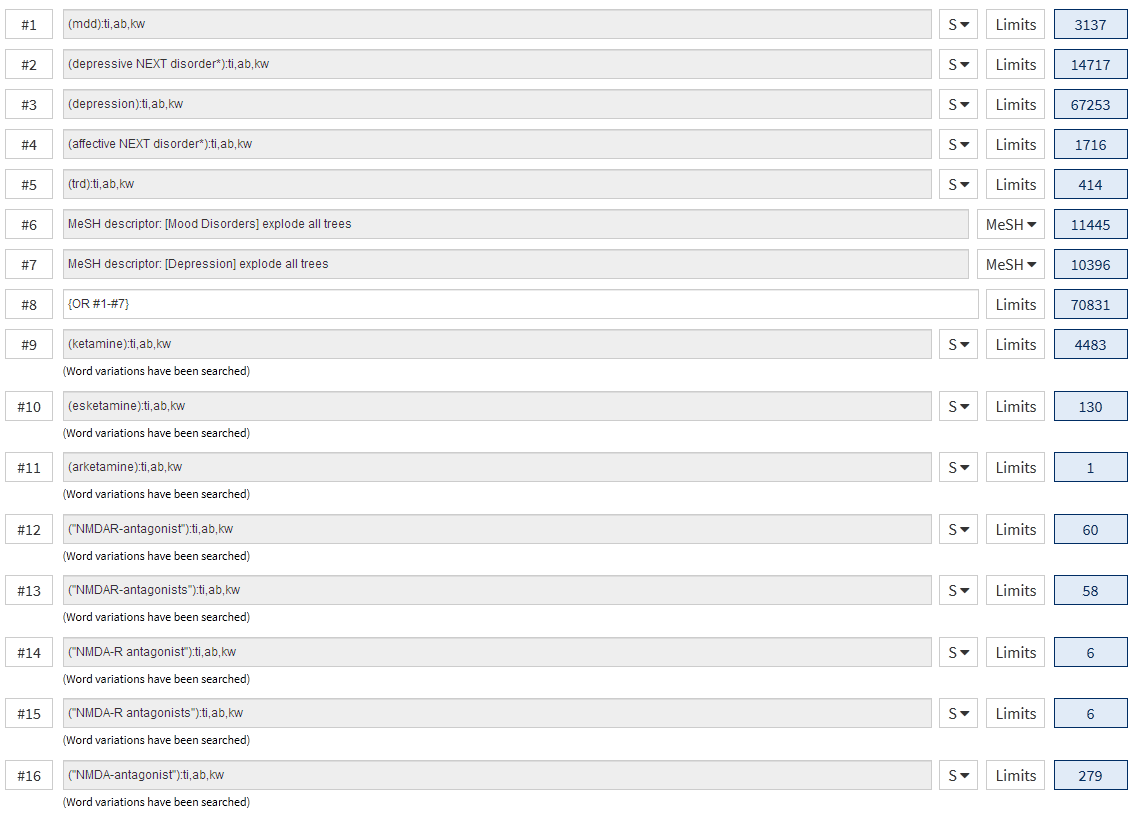


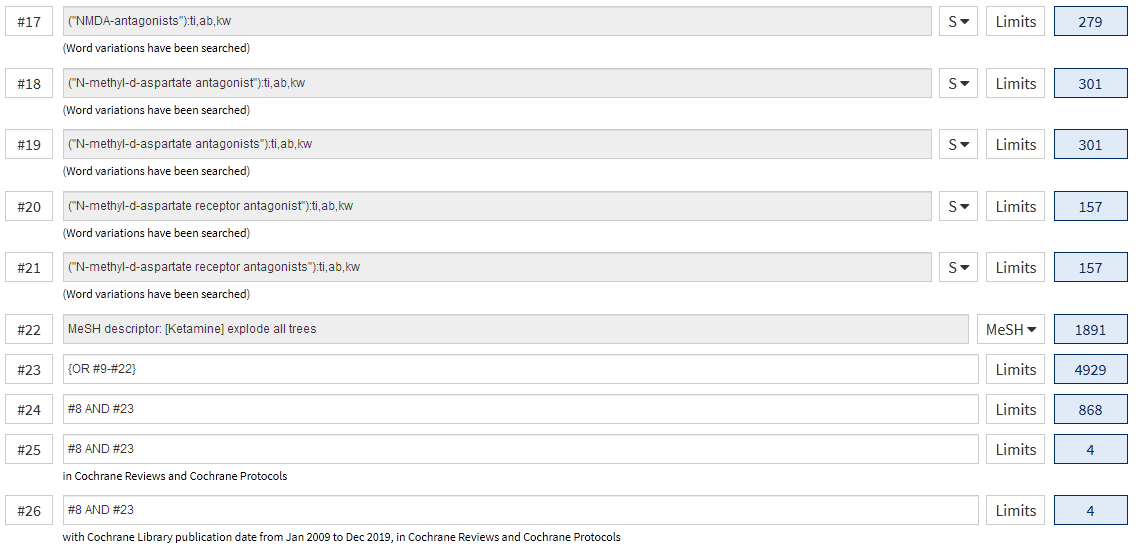


**References in total: 442. After deduplication: 289.**

# PICO 3 (light therapy)

## PubMed

Date of search: 09.08.2019

| **Query** | **Items found** |
| --- | --- |
| Search **((((((("Systematic Review" [Publication Type] OR systematic[sb] OR "Meta-Analysis" [Publication Type]))) OR ((((meta analy* OR metaanaly* OR "pubmed" OR "medline" OR "embase" OR "cochrane"))) OR (("systematic"[Title/Abstract]) AND (review*[Title/Abstract] OR "study"[Title/Abstract] OR "studies"[Title/Abstract] OR search*[Title/Abstract])))) OR "cochrane database syst rev"[Journal]))) AND (((((((((mdd) OR depressive disorder*) OR "depression") OR affective disorder*) OR trd) OR "Mood Disorders"[Mesh]) OR "Depression"[Mesh])) AND ((((("Phototherapy"[Mesh]) OR Light therap*) OR Light treatment*) OR phototherap*) OR photo therap*))** Filters: **Publication date from 2009/01/01 to 2019/12/31; English; Danish; Norwegian; Swedish** | [75](https://www.ncbi.nlm.nih.gov/pubmed/?cmd=HistorySearch&querykey=56) |
| Search **((((((("Systematic Review" [Publication Type] OR systematic[sb] OR "Meta-Analysis" [Publication Type]))) OR ((((meta analy* OR metaanaly* OR "pubmed" OR "medline" OR "embase" OR "cochrane"))) OR (("systematic"[Title/Abstract]) AND (review*[Title/Abstract] OR "study"[Title/Abstract] OR "studies"[Title/Abstract] OR search*[Title/Abstract])))) OR "cochrane database syst rev"[Journal]))) AND (((((((((mdd) OR depressive disorder*) OR "depression") OR affective disorder*) OR trd) OR "Mood Disorders"[Mesh]) OR "Depression"[Mesh])) AND ((((("Phototherapy"[Mesh]) OR Light therap*) OR Light treatment*) OR phototherap*) OR photo therap*))** Filters: **Publication date from 2009/01/01 to 2019/12/31** | [80](https://www.ncbi.nlm.nih.gov/pubmed/?cmd=HistorySearch&querykey=52) |
| Search **((((((("Systematic Review" [Publication Type] OR systematic[sb] OR "Meta-Analysis" [Publication Type]))) OR ((((meta analy* OR metaanaly* OR "pubmed" OR "medline" OR "embase" OR "cochrane"))) OR (("systematic"[Title/Abstract]) AND (review*[Title/Abstract] OR "study"[Title/Abstract] OR "studies"[Title/Abstract] OR search*[Title/Abstract])))) OR "cochrane database syst rev"[Journal]))) AND (((((((((mdd) OR depressive disorder*) OR "depression") OR affective disorder*) OR trd) OR "Mood Disorders"[Mesh]) OR "Depression"[Mesh])) AND ((((("Phototherapy"[Mesh]) OR Light therap*) OR Light treatment*) OR phototherap*) OR photo therap*))** | [118](https://www.ncbi.nlm.nih.gov/pubmed/?cmd=HistorySearch&querykey=51) |
| Search **((((("Systematic Review" [Publication Type] OR systematic[sb] OR "Meta-Analysis" [Publication Type]))) OR ((((meta analy* OR metaanaly* OR "pubmed" OR "medline" OR "embase" OR "cochrane"))) OR (("systematic"[Title/Abstract]) AND (review*[Title/Abstract] OR "study"[Title/Abstract] OR "studies"[Title/Abstract] OR search*[Title/Abstract])))) OR "cochrane database syst rev"[Journal])** | [445418](https://www.ncbi.nlm.nih.gov/pubmed/?cmd=HistorySearch&querykey=50) |
| Search **((((((((mdd) OR depressive disorder*) OR "depression") OR affective disorder*) OR trd) OR "Mood Disorders"[Mesh]) OR "Depression"[Mesh])) AND ((((("Phototherapy"[Mesh]) OR Light therap*) OR Light treatment*) OR phototherap*) OR photo therap*)** | [1491](https://www.ncbi.nlm.nih.gov/pubmed/?cmd=HistorySearch&querykey=49) |
| Search **(((("Phototherapy"[Mesh]) OR Light therap*) OR Light treatment*) OR phototherap*) OR photo therap*** | [45295](https://www.ncbi.nlm.nih.gov/pubmed/?cmd=HistorySearch&querykey=48) |
| Search **photo therap*** | [88](https://www.ncbi.nlm.nih.gov/pubmed/?cmd=HistorySearch&querykey=47) |
| Search **phototherap*** | [14034](https://www.ncbi.nlm.nih.gov/pubmed/?cmd=HistorySearch&querykey=46) |
| Search **Light treatment*** | [2426](https://www.ncbi.nlm.nih.gov/pubmed/?cmd=HistorySearch&querykey=45) |
| Search **Light therap*** | [7226](https://www.ncbi.nlm.nih.gov/pubmed/?cmd=HistorySearch&querykey=44) |
| Search **"Phototherapy"[Mesh]** | [39125](https://www.ncbi.nlm.nih.gov/pubmed/?cmd=HistorySearch&querykey=43) |
| Search **((((((mdd) OR depressive disorder*) OR "depression") OR affective disorder*) OR trd) OR "Mood Disorders"[Mesh]) OR "Depression"[Mesh]** | [432096](https://www.ncbi.nlm.nih.gov/pubmed/?cmd=HistorySearch&querykey=42) |
| Search **"Depression"[Mesh]** | [110768](https://www.ncbi.nlm.nih.gov/pubmed/?cmd=HistorySearch&querykey=41) |
| Search **"Mood Disorders"[Mesh]** | [117115](https://www.ncbi.nlm.nih.gov/pubmed/?cmd=HistorySearch&querykey=40) |
| Search **trd** | [1415](https://www.ncbi.nlm.nih.gov/pubmed/?cmd=HistorySearch&querykey=37) |
| Search **affective disorder*** | [19290](https://www.ncbi.nlm.nih.gov/pubmed/?cmd=HistorySearch&querykey=36) |
| Search **"depression"** | [379857](https://www.ncbi.nlm.nih.gov/pubmed/?cmd=HistorySearch&querykey=35) |
| Search **depressive disorder*** | [111629](https://www.ncbi.nlm.nih.gov/pubmed/?cmd=HistorySearch&querykey=34) |
| Search **mdd** | [11911](https://www.ncbi.nlm.nih.gov/pubmed/?cmd=HistorySearch&querykey=33) |

## Embase

Date of search: 09.08.2019

| **#** | **Searches** | **Results** |
| --- | --- | --- |
| 1 | mdd.mp. | 18010 |
| 2 | depressive disorder*.mp. | 50424 |
| 3 | depression.mp. | 635687 |
| 4 | affective disorder*.mp. | 24448 |
| 5 | trd.mp. | 2283 |
| 6 | exp mood disorder/ | 486593 |
| 7 | 1 or 2 or 3 or 4 or 5 or 6 | 715022 |
| 8 | ((systematic adj3 (review* or study or studies or search*)) or meta analy* or meta-analy* or metaanaly*).ti,ab,kw. | 349121 |
| 9 | Cochrane.jx. | 20531 |
| 10 | 8 or 9 | 363529 |
| 11 | exp phototherapy/ | 82166 |
| 12 | exp phototherapy device/ | 953 |
| 13 | light therap*.mp. | 3344 |
| 14 | light treatment*.mp. | 2571 |
| 15 | phototherap*.mp. | 26832 |
| 16 | photo therap*.mp. | 151 |
| 17 | 11 or 12 or 13 or 14 or 15 or 16 | 86885 |
| 18 | 7 and 17 | 3029 |
| 19 | limit 18 to (meta analysis or "systematic review") | 151 |
| 20 | 10 and 18 | 157 |
| 21 | 19 or 20 | 215 |
| 22 | 21 not Conference Abstract.pt. | 204 |
| 23 | limit 22 to yr="2009 - 2019" | 132 |
| 24 | limit 23 to (danish or english or norwegian or swedish) | 128 |

## PsycInfo

Date of search: 09.08.2019

| **#** | **Searches** | **Results** |
| --- | --- | --- |
| 1 | mdd.mp. | 9781 |
| 2 | depressive disorder*.mp. | 74502 |
| 3 | depression.mp. | 313349 |
| 4 | affective disorder*.mp. | 33437 |
| 5 | trd.mp. | 681 |
| 6 | exp affective disorders/ | 136260 |
| 7 | "depression (emotion)"/ | 25026 |
| 8 | 1 or 2 or 3 or 4 or 5 or 6 or 7 | 341120 |
| 9 | (((systematic or method* or rapid or integrative) adj3 (review* or overview* or study or studies or search* or approach*)) or meta analy* or meta-analy* or metaanaly*).ti,ab,id. | 178703 |
| 10 | (pooled adj1 (data or analys*)).ti,ab. | 1789 |
| 11 | 9 or 10 | 179967 |
| 12 | phototherapy/ | 930 |
| 13 | light therap*.mp. | 916 |
| 14 | light treatment*.mp. | 400 |
| 15 | phototherap*.mp. | 1357 |
| 16 | photo therap*.mp. | 12 |
| 17 | 12 or 13 or 14 or 15 or 16 | 1732 |
| 18 | 8 and 17 | 1067 |
| 19 | limit 18 to ("0830 systematic review" or 1200 meta analysis) | 31 |
| 20 | 11 and 18 | 75 |
| 21 | 19 or 20 | 76 |
| 22 | limit 21 to yr="2009 - 2019" | 50 |
| 23 | limit 22 to (danish or english or norwegian or swedish) | 47 |

## CINAHL

Date of search: 09.08.2019

| **#** | **Query** | **Limiters/Expanders** | **Results** |
| --- | --- | --- | --- |
| S23 | S13 AND S20 | Limiters - Published Date: 20090101-20191231; Language: Danish, English, Norwegian, Swedish  Search modes - Boolean/Phrase | 35 |
| S22 | S13 AND S20 | Limiters - Published Date: 20090101-20191231  Search modes - Boolean/Phrase | 35 |
| S21 | S13 AND S20 | Search modes - Boolean/Phrase | 49 |
| S20 | S7 AND S19 | Search modes - Boolean/Phrase | 480 |
| S19 | S14 OR S15 OR S16 OR S17 OR S18 | Search modes - Boolean/Phrase | 4,000 |
| S18 | "photo therap*" | Search modes - Boolean/Phrase | 13 |
| S17 | phototherap* | Search modes - Boolean/Phrase | 3,621 |
| S16 | "light treatment*" | Search modes - Boolean/Phrase | 182 |
| S15 | "light therap*" | Search modes - Boolean/Phrase | 620 |
| S14 | (MH "Phototherapy") | Search modes - Boolean/Phrase | 2,949 |
| S13 | S8 OR S9 OR S10 OR S11 OR S12 | Search modes - Boolean/Phrase | 304,708 |
| S12 | (pooled N1 (data or analys*)) | Search modes - Boolean/Phrase | 7,564 |
| S11 | (((systematic or method* or rapid or integrative) N3 (review* or overview* or study or studies or search* or approach*)) or meta analy* or meta-analy* or metaanaly*) | Search modes - Boolean/Phrase | 294,355 |
| S10 | (MH "Meta Analysis") | Search modes - Boolean/Phrase | 39,163 |
| S9 | (MH "Systematic Review") | Search modes - Boolean/Phrase | 72,700 |
| S8 | PT (Systematic Review or Meta Analysis) | Search modes - Boolean/Phrase | 86,925 |
| S7 | S1 OR S2 OR S3 OR S4 OR S5 OR S6 | Search modes - Boolean/Phrase | 152,765 |
| S6 | (MH "Affective Disorders+") | Search modes - Boolean/Phrase | 103,893 |
| S5 | trd | Search modes - Boolean/Phrase | 262 |
| S4 | "affective disorder*" | Search modes - Boolean/Phrase | 9,103 |
| S3 | depression | Search modes - Boolean/Phrase | 145,047 |
| S2 | "depressive disorder*" | Search modes - Boolean/Phrase | 9,107 |
| S1 | mdd | Search modes - Boolean/Phrase | 3,104 |

## The Cochrane library

Date of search: 09.08.2019


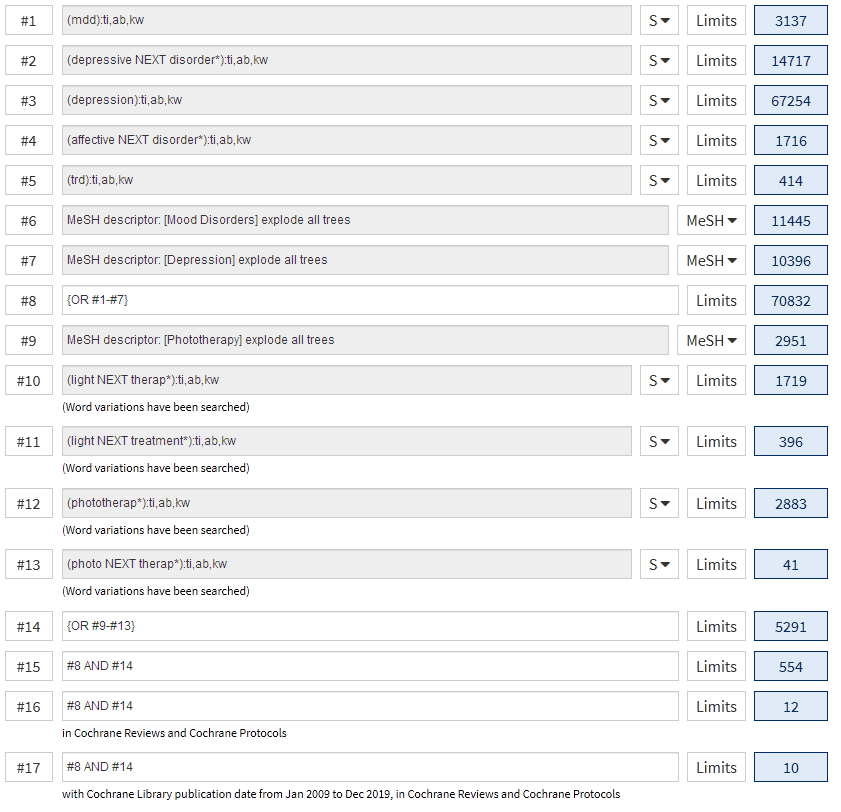


**References in total: 295. After deduplication: 176.**

# PICO 4 (CBASP)

## PubMed

Date of search: 12.08.2019

| Search **((((((((("Systematic Review" [Publication Type] OR systematic[sb] OR "Meta-Analysis" [Publication Type]))) OR ((((meta analy* OR metaanaly* OR "pubmed" OR "medline" OR "embase" OR "cochrane"))) OR (("systematic"[Title/Abstract]) AND (review*[Title/Abstract] OR "study"[Title/Abstract] OR "studies"[Title/Abstract] OR search*[Title/Abstract])))) OR "cochrane database syst rev"[Journal]))))) AND (((((cbasp) OR "Cognitive Behavioural" "Analysis System" "Psychotherapy") OR "Cognitive Behavioral Analysis System of Psychotherapy")) AND (((((((mdd) OR depressive disorder*) OR "depression") OR affective disorder*) OR trd) OR "Mood Disorders"[Mesh]) OR "Depression"[Mesh]))** Filters: **Publication date from 2009/01/01 to 2019/12/31; English; Danish; Norwegian; Swedish** | [10](https://www.ncbi.nlm.nih.gov/pubmed/?cmd=HistorySearch&querykey=25) |
| --- | --- |
| Search **((((((((("Systematic Review" [Publication Type] OR systematic[sb] OR "Meta-Analysis" [Publication Type]))) OR ((((meta analy* OR metaanaly* OR "pubmed" OR "medline" OR "embase" OR "cochrane"))) OR (("systematic"[Title/Abstract]) AND (review*[Title/Abstract] OR "study"[Title/Abstract] OR "studies"[Title/Abstract] OR search*[Title/Abstract])))) OR "cochrane database syst rev"[Journal]))))) AND (((((cbasp) OR "Cognitive Behavioural" "Analysis System" "Psychotherapy") OR "Cognitive Behavioral Analysis System of Psychotherapy")) AND (((((((mdd) OR depressive disorder*) OR "depression") OR affective disorder*) OR trd) OR "Mood Disorders"[Mesh]) OR "Depression"[Mesh]))** Filters: **Publication date from 2009/01/01 to 2019/12/31** | [10](https://www.ncbi.nlm.nih.gov/pubmed/?cmd=HistorySearch&querykey=21) |
| Search **((((((((("Systematic Review" [Publication Type] OR systematic[sb] OR "Meta-Analysis" [Publication Type]))) OR ((((meta analy* OR metaanaly* OR "pubmed" OR "medline" OR "embase" OR "cochrane"))) OR (("systematic"[Title/Abstract]) AND (review*[Title/Abstract] OR "study"[Title/Abstract] OR "studies"[Title/Abstract] OR search*[Title/Abstract])))) OR "cochrane database syst rev"[Journal]))))) AND (((((cbasp) OR "Cognitive Behavioural" "Analysis System" "Psychotherapy") OR "Cognitive Behavioral Analysis System of Psychotherapy")) AND (((((((mdd) OR depressive disorder*) OR "depression") OR affective disorder*) OR trd) OR "Mood Disorders"[Mesh]) OR "Depression"[Mesh]))** | [11](https://www.ncbi.nlm.nih.gov/pubmed/?cmd=HistorySearch&querykey=20) |
| Search **((((((("Systematic Review" [Publication Type] OR systematic[sb] OR "Meta-Analysis" [Publication Type]))) OR ((((meta analy* OR metaanaly* OR "pubmed" OR "medline" OR "embase" OR "cochrane"))) OR (("systematic"[Title/Abstract]) AND (review*[Title/Abstract] OR "study"[Title/Abstract] OR "studies"[Title/Abstract] OR search*[Title/Abstract])))) OR "cochrane database syst rev"[Journal])))** | [445651](https://www.ncbi.nlm.nih.gov/pubmed/?cmd=HistorySearch&querykey=19) |
| Search **((((cbasp) OR "Cognitive Behavioural" "Analysis System" "Psychotherapy") OR "Cognitive Behavioral Analysis System of Psychotherapy")) AND (((((((mdd) OR depressive disorder*) OR "depression") OR affective disorder*) OR trd) OR "Mood Disorders"[Mesh]) OR "Depression"[Mesh])** | [89](https://www.ncbi.nlm.nih.gov/pubmed/?cmd=HistorySearch&querykey=18) |
| Search **((cbasp) OR "Cognitive Behavioural" "Analysis System" "Psychotherapy") OR "Cognitive Behavioral Analysis System of Psychotherapy"** | [92](https://www.ncbi.nlm.nih.gov/pubmed/?cmd=HistorySearch&querykey=17) |
| Search **"Cognitive Behavioral Analysis System of Psychotherapy"** | [83](https://www.ncbi.nlm.nih.gov/pubmed/?cmd=HistorySearch&querykey=16) |
| Search **"Cognitive Behavioural" "Analysis System" "Psychotherapy"** | [8](https://www.ncbi.nlm.nih.gov/pubmed/?cmd=HistorySearch&querykey=15) |
| Search **cbasp** | [79](https://www.ncbi.nlm.nih.gov/pubmed/?cmd=HistorySearch&querykey=11) |
| Search **((((((mdd) OR depressive disorder*) OR "depression") OR affective disorder*) OR trd) OR "Mood Disorders"[Mesh]) OR "Depression"[Mesh]** | [432219](https://www.ncbi.nlm.nih.gov/pubmed/?cmd=HistorySearch&querykey=10) |
| Search **"Depression"[Mesh]** | [110787](https://www.ncbi.nlm.nih.gov/pubmed/?cmd=HistorySearch&querykey=9) |
| Search **"Mood Disorders"[Mesh]** | [117123](https://www.ncbi.nlm.nih.gov/pubmed/?cmd=HistorySearch&querykey=8) |
| Search **trd** | [1416](https://www.ncbi.nlm.nih.gov/pubmed/?cmd=HistorySearch&querykey=5) |
| Search **affective disorder*** | [19296](https://www.ncbi.nlm.nih.gov/pubmed/?cmd=HistorySearch&querykey=4) |
| Search **"depression"** | [379973](https://www.ncbi.nlm.nih.gov/pubmed/?cmd=HistorySearch&querykey=3) |
| Search **depressive disorder*** | [111645](https://www.ncbi.nlm.nih.gov/pubmed/?cmd=HistorySearch&querykey=2) |
| Search **mdd** | [11917](https://www.ncbi.nlm.nih.gov/pubmed/?cmd=HistorySearch&querykey=1) |

## Embase

Date of search: 12.08.2019

| **#** | **Searches** | **Results** |
| --- | --- | --- |
| 1 | mdd.mp. | 18016 |
| 2 | depressive disorder*.mp. | 50438 |
| 3 | depression.mp. | 636016 |
| 4 | affective disorder*.mp. | 24448 |
| 5 | trd.mp. | 2284 |
| 6 | exp mood disorder/ | 486932 |
| 7 | 1 or 2 or 3 or 4 or 5 or 6 | 715372 |
| 8 | ((systematic adj3 (review* or study or studies or search*)) or meta analy* or meta-analy* or metaanaly*).ti,ab,kw. | 349310 |
| 9 | Cochrane.jx. | 20535 |
| 10 | 8 or 9 | 363721 |
| 11 | cbasp.mp. | 117 |
| 12 | Cognitive Behavioral Analysis System of Psychotherapy.mp. | 118 |
| 13 | Cognitive Behavioural Analysis System of Psychotherapy.mp. | 14 |
| 14 | 11 or 12 or 13 | 146 |
| 15 | 7 and 14 | 141 |
| 16 | limit 15 to (meta analysis or "systematic review") | 11 |
| 17 | 10 and 15 | 15 |
| 18 | 16 or 17 | 15 |
| 19 | 18 not Conference Abstract.pt. | 14 |
| 20 | limit 19 to yr="2009 - 2019" | 13 |
| 21 | limit 20 to (danish or english or norwegian or swedish) | 12 |

## PsycInfo

Date of search: 12.08.2019

| **#** | **Searches** | **Results** |
| --- | --- | --- |
| 1 | mdd.mp. | 9781 |
| 2 | depressive disorder*.mp. | 74502 |
| 3 | depression.mp. | 313349 |
| 4 | affective disorder*.mp. | 33437 |
| 5 | trd.mp. | 681 |
| 6 | exp affective disorders/ | 136260 |
| 7 | "depression (emotion)"/ | 25026 |
| 8 | 1 or 2 or 3 or 4 or 5 or 6 or 7 | 341120 |
| 9 | (((systematic or method* or rapid or integrative) adj3 (review* or overview* or study or studies or search* or approach*)) or meta analy* or meta-analy* or metaanaly*).ti,ab,id. | 178703 |
| 10 | (pooled adj1 (data or analys*)).ti,ab. | 1789 |
| 11 | 9 or 10 | 179967 |
| 12 | cbasp.mp. | 129 |
| 13 | Cognitive Behavioral Analysis System of Psychotherapy.mp. | 144 |
| 14 | Cognitive Behavioural Analysis System of Psychotherapy.mp. | 8 |
| 15 | 12 or 13 or 14 | 163 |
| 16 | 8 and 15 | 149 |
| 17 | limit 16 to ("0830 systematic review" or 1200 meta analysis) | 6 |
| 18 | 11 and 16 | 12 |
| 19 | 17 or 18 | 12 |
| 20 | limit 19 to yr="2009 - 2019" | 9 |
| 21 | limit 20 to (danish or english or norwegian or swedish) | 8 |

## CINAHL

Date of search: 12.08.2019

| S21 | S13 AND S18 | Limiters - Published Date: 20090101-20191231; Language: Danish, English, Norwegian, Swedish  Search modes - Boolean/Phrase | 2 |
| --- | --- | --- | --- |
| S20 | S13 AND S18 | Limiters - Published Date: 20090101-20191231  Search modes - Boolean/Phrase | 2 |
| S19 | S13 AND S18 | Search modes - Boolean/Phrase | 2 |
| S18 | S7 AND S17 | Search modes - Boolean/Phrase | 33 |
| S17 | S14 OR S15 OR S16 | Search modes - Boolean/Phrase | 33 |
| S16 | "Cognitive Behavioural Analysis System of Psychotherapy" | Search modes - Boolean/Phrase | 4 |
| S15 | "Cognitive Behavioral Analysis System of Psychotherapy" | Search modes - Boolean/Phrase | 28 |
| S14 | cbasp | Search modes - Boolean/Phrase | 20 |
| S13 | S8 OR S9 OR S10 OR S11 OR S12 | Search modes - Boolean/Phrase | 304,940 |
| S12 | (pooled N1 (data or analys*)) | Search modes - Boolean/Phrase | 7,586 |
| S11 | (((systematic or method* or rapid or integrative) N3 (review* or overview* or study or studies or search* or approach*)) or meta analy* or meta-analy* or metaanaly*) | Search modes - Boolean/Phrase | 294,573 |
| S10 | (MH "Meta Analysis") | Search modes - Boolean/Phrase | 39,191 |
| S9 | (MH "Systematic Review") | Search modes - Boolean/Phrase | 72,706 |
| S8 | PT (Systematic Review or Meta Analysis) | Search modes - Boolean/Phrase | 86,926 |
| S7 | S1 OR S2 OR S3 OR S4 OR S5 OR S6 | Search modes - Boolean/Phrase | 153,008 |
| S6 | (MH "Affective Disorders+") | Search modes - Boolean/Phrase | 103,980 |
| S5 | trd | Search modes - Boolean/Phrase | 262 |
| S4 | "affective disorder*" | Search modes - Boolean/Phrase | 9,105 |
| S3 | depression | Search modes - Boolean/Phrase | 145,284 |
| S2 | "depressive disorder*" | Search modes - Boolean/Phrase | 9,118 |
| S1 | mdd | Search modes - Boolean/Phrase | 3,109 |

## The Cochrane library

Date of search: 12.08.2019


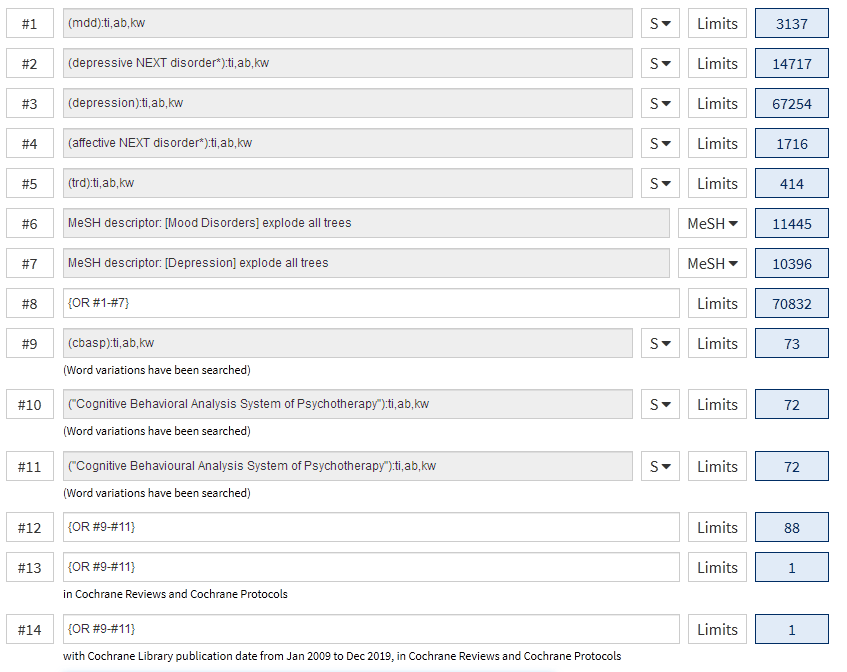


**References in total: 33. After deduplication: 19.**

# PICO 5 (rumination)

## PubMed

Date of search: 03.09.2019

| **Query** | **Items found** |
| --- | --- |
| Search **(((((((((("Systematic Review" [Publication Type] OR systematic[sb] OR "Meta-Analysis" [Publication Type]))) OR ((((meta analy* OR metaanaly* OR "pubmed" OR "medline" OR "embase" OR "cochrane"))) OR (("systematic"[Title/Abstract]) AND (review*[Title/Abstract] OR "study"[Title/Abstract] OR "studies"[Title/Abstract] OR search*[Title/Abstract])))) OR "cochrane database syst rev"[Journal])))))) AND ((((((((((((((((((((((((("Mindfulness"[Mesh]) OR "Mindfulness") OR "Rumination, Cognitive"[Mesh]) OR rumination*) OR "cbm") OR "cognitive bias modification") OR "attentional bias modification") OR "abm") OR "attention bias modification") OR "cct") OR "Cognitive Control Training") OR mbct) OR "cnt") OR "Concreteness training") OR "mct") OR meta cognitive therap*) OR metacognitive therap*) OR ("rf" cbt)) OR "perseverative thinking") OR rnt) OR "repetitive negative thinking") OR "worries") OR "worry")) AND (((((((affective disorder*) OR trd) OR "Mood Disorders"[Mesh]) OR "Depression"[Mesh]) OR mdd) OR depressive disorder*) OR "depression"))** Filters: **Publication date from 2009/01/01 to 2019/12/31; English; Danish; Norwegian; Swedish** | [401](https://www.ncbi.nlm.nih.gov/pubmed/?cmd=HistorySearch&querykey=54) |
| Search **(((((((((("Systematic Review" [Publication Type] OR systematic[sb] OR "Meta-Analysis" [Publication Type]))) OR ((((meta analy* OR metaanaly* OR "pubmed" OR "medline" OR "embase" OR "cochrane"))) OR (("systematic"[Title/Abstract]) AND (review*[Title/Abstract] OR "study"[Title/Abstract] OR "studies"[Title/Abstract] OR search*[Title/Abstract])))) OR "cochrane database syst rev"[Journal])))))) AND ((((((((((((((((((((((((("Mindfulness"[Mesh]) OR "Mindfulness") OR "Rumination, Cognitive"[Mesh]) OR rumination*) OR "cbm") OR "cognitive bias modification") OR "attentional bias modification") OR "abm") OR "attention bias modification") OR "cct") OR "Cognitive Control Training") OR mbct) OR "cnt") OR "Concreteness training") OR "mct") OR meta cognitive therap*) OR metacognitive therap*) OR ("rf" cbt)) OR "perseverative thinking") OR rnt) OR "repetitive negative thinking") OR "worries") OR "worry")) AND (((((((affective disorder*) OR trd) OR "Mood Disorders"[Mesh]) OR "Depression"[Mesh]) OR mdd) OR depressive disorder*) OR "depression"))** Filters: **Publication date from 2009/01/01 to 2019/12/31** | [416](https://www.ncbi.nlm.nih.gov/pubmed/?cmd=HistorySearch&querykey=50) |
| Search **(((((((((("Systematic Review" [Publication Type] OR systematic[sb] OR "Meta-Analysis" [Publication Type]))) OR ((((meta analy* OR metaanaly* OR "pubmed" OR "medline" OR "embase" OR "cochrane"))) OR (("systematic"[Title/Abstract]) AND (review*[Title/Abstract] OR "study"[Title/Abstract] OR "studies"[Title/Abstract] OR search*[Title/Abstract])))) OR "cochrane database syst rev"[Journal])))))) AND ((((((((((((((((((((((((("Mindfulness"[Mesh]) OR "Mindfulness") OR "Rumination, Cognitive"[Mesh]) OR rumination*) OR "cbm") OR "cognitive bias modification") OR "attentional bias modification") OR "abm") OR "attention bias modification") OR "cct") OR "Cognitive Control Training") OR mbct) OR "cnt") OR "Concreteness training") OR "mct") OR meta cognitive therap*) OR metacognitive therap*) OR ("rf" cbt)) OR "perseverative thinking") OR rnt) OR "repetitive negative thinking") OR "worries") OR "worry")) AND (((((((affective disorder*) OR trd) OR "Mood Disorders"[Mesh]) OR "Depression"[Mesh]) OR mdd) OR depressive disorder*) OR "depression"))** | [451](https://www.ncbi.nlm.nih.gov/pubmed/?cmd=HistorySearch&querykey=49) |
| Search **(((((((("Systematic Review" [Publication Type] OR systematic[sb] OR "Meta-Analysis" [Publication Type]))) OR ((((meta analy* OR metaanaly* OR "pubmed" OR "medline" OR "embase" OR "cochrane"))) OR (("systematic"[Title/Abstract]) AND (review*[Title/Abstract] OR "study"[Title/Abstract] OR "studies"[Title/Abstract] OR search*[Title/Abstract])))) OR "cochrane database syst rev"[Journal]))))** | [448844](https://www.ncbi.nlm.nih.gov/pubmed/?cmd=HistorySearch&querykey=48) |
| Search **(((((((((((((((((((((((("Mindfulness"[Mesh]) OR "Mindfulness") OR "Rumination, Cognitive"[Mesh]) OR rumination*) OR "cbm") OR "cognitive bias modification") OR "attentional bias modification") OR "abm") OR "attention bias modification") OR "cct") OR "Cognitive Control Training") OR mbct) OR "cnt") OR "Concreteness training") OR "mct") OR meta cognitive therap*) OR metacognitive therap*) OR ("rf" cbt)) OR "perseverative thinking") OR rnt) OR "repetitive negative thinking") OR "worries") OR "worry")) AND (((((((affective disorder*) OR trd) OR "Mood Disorders"[Mesh]) OR "Depression"[Mesh]) OR mdd) OR depressive disorder*) OR "depression")** | [5472](https://www.ncbi.nlm.nih.gov/pubmed/?cmd=HistorySearch&querykey=47) |
| Search **(((((((((((((((((((((("Mindfulness"[Mesh]) OR "Mindfulness") OR "Rumination, Cognitive"[Mesh]) OR rumination*) OR "cbm") OR "cognitive bias modification") OR "attentional bias modification") OR "abm") OR "attention bias modification") OR "cct") OR "Cognitive Control Training") OR mbct) OR "cnt") OR "Concreteness training") OR "mct") OR meta cognitive therap*) OR metacognitive therap*) OR ("rf" cbt)) OR "perseverative thinking") OR rnt) OR "repetitive negative thinking") OR "worries") OR "worry"** | [50060](https://www.ncbi.nlm.nih.gov/pubmed/?cmd=HistorySearch&querykey=46) |
| Search **"worry"** | [8824](https://www.ncbi.nlm.nih.gov/pubmed/?cmd=HistorySearch&querykey=45) |
| Search **"worries"** | [3885](https://www.ncbi.nlm.nih.gov/pubmed/?cmd=HistorySearch&querykey=44) |
| Search **"repetitive negative thinking"** | [99](https://www.ncbi.nlm.nih.gov/pubmed/?cmd=HistorySearch&querykey=43) |
| Search **rnt** | [354](https://www.ncbi.nlm.nih.gov/pubmed/?cmd=HistorySearch&querykey=40) |
| Search **"perseverative thinking"** | [50](https://www.ncbi.nlm.nih.gov/pubmed/?cmd=HistorySearch&querykey=39) |
| Search **("rf" cbt)** | [7](https://www.ncbi.nlm.nih.gov/pubmed/?cmd=HistorySearch&querykey=36) |
| Search **metacognitive therap*** | [147](https://www.ncbi.nlm.nih.gov/pubmed/?cmd=HistorySearch&querykey=35) |
| Search **meta cognitive therap*** | [10](https://www.ncbi.nlm.nih.gov/pubmed/?cmd=HistorySearch&querykey=34) |
| Search **"mct"** | [6112](https://www.ncbi.nlm.nih.gov/pubmed/?cmd=HistorySearch&querykey=31) |
| Search **"Concreteness training"** | [10](https://www.ncbi.nlm.nih.gov/pubmed/?cmd=HistorySearch&querykey=30) |
| Search **"cnt"** | [7106](https://www.ncbi.nlm.nih.gov/pubmed/?cmd=HistorySearch&querykey=27) |
| Search **mbct** | [407](https://www.ncbi.nlm.nih.gov/pubmed/?cmd=HistorySearch&querykey=26) |
| Search **"Cognitive Control Training"** | [29](https://www.ncbi.nlm.nih.gov/pubmed/?cmd=HistorySearch&querykey=25) |
| Search **"cct"** | [7643](https://www.ncbi.nlm.nih.gov/pubmed/?cmd=HistorySearch&querykey=22) |
| Search **"attention bias modification"** | [173](https://www.ncbi.nlm.nih.gov/pubmed/?cmd=HistorySearch&querykey=21) |
| Search **"abm"** | [1413](https://www.ncbi.nlm.nih.gov/pubmed/?cmd=HistorySearch&querykey=20) |
| Search **"attentional bias modification"** | [98](https://www.ncbi.nlm.nih.gov/pubmed/?cmd=HistorySearch&querykey=19) |
| Search **"cognitive bias modification"** | [300](https://www.ncbi.nlm.nih.gov/pubmed/?cmd=HistorySearch&querykey=18) |
| Search **"cbm"** | [4900](https://www.ncbi.nlm.nih.gov/pubmed/?cmd=HistorySearch&querykey=17) |
| Search **rumination*** | [3916](https://www.ncbi.nlm.nih.gov/pubmed/?cmd=HistorySearch&querykey=16) |
| Search **"Rumination, Cognitive"[Mesh]** | [208](https://www.ncbi.nlm.nih.gov/pubmed/?cmd=HistorySearch&querykey=15) |
| Search **"Mindfulness"** | [6857](https://www.ncbi.nlm.nih.gov/pubmed/?cmd=HistorySearch&querykey=14) |
| Search **"Mindfulness"[Mesh]** | [2604](https://www.ncbi.nlm.nih.gov/pubmed/?cmd=HistorySearch&querykey=13) |
| Search **((((((affective disorder*) OR trd) OR "Mood Disorders"[Mesh]) OR "Depression"[Mesh]) OR mdd) OR depressive disorder*) OR "depression"** | [433688](https://www.ncbi.nlm.nih.gov/pubmed/?cmd=HistorySearch&querykey=12) |
| Search **"depression"** | [381325](https://www.ncbi.nlm.nih.gov/pubmed/?cmd=HistorySearch&querykey=11) |
| Search **depressive disorder*** | [111974](https://www.ncbi.nlm.nih.gov/pubmed/?cmd=HistorySearch&querykey=10) |
| Search **mdd** | [12005](https://www.ncbi.nlm.nih.gov/pubmed/?cmd=HistorySearch&querykey=9) |
| Search **"Depression"[Mesh]** | [111279](https://www.ncbi.nlm.nih.gov/pubmed/?cmd=HistorySearch&querykey=8) |
| Search **"Mood Disorders"[Mesh]** | [117424](https://www.ncbi.nlm.nih.gov/pubmed/?cmd=HistorySearch&querykey=7) |
| Search **trd** | [1428](https://www.ncbi.nlm.nih.gov/pubmed/?cmd=HistorySearch&querykey=4) |
| Search **affective disorder*** | [19339](https://www.ncbi.nlm.nih.gov/pubmed/?cmd=HistorySearch&querykey=3) |

## Embase

Date of search: 04.09.2019

| **#** | **Searches** | **Results** |
| --- | --- | --- |
| 1 | mdd.mp. | 18110 |
| 2 | depressive disorder*.mp. | 50675 |
| 3 | depression.mp. | 639126 |
| 4 | affective disorder*.mp. | 24500 |
| 5 | trd.mp. | 2296 |
| 6 | exp mood disorder/ | 489218 |
| 7 | 1 or 2 or 3 or 4 or 5 or 6 | 718762 |
| 8 | ((systematic adj3 (review* or study or studies or search*)) or meta analy* or meta-analy* or metaanaly*).ti,ab,kw. | 353249 |
| 9 | Cochrane.jx. | 20561 |
| 10 | 8 or 9 | 367680 |
| 11 | mindfulness/ | 6987 |
| 12 | mindfulness.mp. | 10250 |
| 13 | cognitive rumination/ | 297 |
| 14 | rumination*.mp. | 5330 |
| 15 | cbm.mp. | 5787 |
| 16 | cognitive bias modification.mp. | 399 |
| 17 | attentional bias modification.mp. | 127 |
| 18 | abm.mp. | 1611 |
| 19 | attention bias modification.mp. | 198 |
| 20 | cct.mp. | 8070 |
| 21 | Cognitive Control Training.mp. | 51 |
| 22 | mbct.mp. | 577 |
| 23 | cnt.mp. | 5628 |
| 24 | Concreteness training.mp. | 11 |
| 25 | mct.mp. | 9507 |
| 26 | meta cognitive therap*.mp. | 20 |
| 27 | metacognitive therap*.mp. | 197 |
| 28 | rfcbt.mp. | 8 |
| 29 | rf cbt.mp. | 0 |
| 30 | perseverative thinking.mp. | 79 |
| 31 | rnt.mp. | 278 |
| 32 | repetitive negative thinking.mp. | 121 |
| 33 | worries.mp. | 5547 |
| 34 | worry.mp. | 14316 |
| 35 | 11 or 12 or 13 or 14 or 15 or 16 or 17 or 18 or 19 or 20 or 21 or 22 or 23 or 24 or 25 or 26 or 27 or 28 or 29 or 30 or 31 or 32 or 33 or 34 | 64292 |
| 36 | 7 and 35 | 9652 |
| 37 | limit 36 to (meta analysis or "systematic review") | 541 |
| 38 | 10 and 36 | 624 |
| 39 | 37 or 38 | 694 |
| 40 | 39 not Conference Abstract.pt. | 586 |

## PsycInfo

Date of search: 04.09.2019

| **#** | **Searches** | **Results** |
| --- | --- | --- |
| 1 | mdd.mp. | 9837 |
| 2 | depressive disorder*.mp. | 74628 |
| 3 | depression.mp. | 314287 |
| 4 | affective disorder*.mp. | 33512 |
| 5 | trd.mp. | 689 |
| 6 | exp affective disorders/ | 136684 |
| 7 | "depression (emotion)"/ | 25059 |
| 8 | 1 or 2 or 3 or 4 or 5 or 6 or 7 | 342112 |
| 9 | (((systematic or method* or rapid or integrative) adj3 (review* or overview* or study or studies or search* or approach*)) or meta analy* or meta-analy* or metaanaly*).ti,ab,id. | 179642 |
| 10 | (pooled adj1 (data or analys*)).ti,ab. | 1795 |
| 11 | 9 or 10 | 180909 |
| 12 | mindfulness/ | 8871 |
| 13 | mindfulness-based interventions/ | 504 |
| 14 | mindfulness.mp. | 12916 |
| 15 | "rumination (cognitive process)"/ | 2112 |
| 16 | rumination*.mp. | 5617 |
| 17 | cbm.mp. | 992 |
| 18 | cognitive bias modification.mp. | 367 |
| 19 | attentional bias modification.mp. | 103 |
| 20 | abm.mp. | 315 |
| 21 | attention bias modification.mp. | 174 |
| 22 | cct.mp. | 667 |
| 23 | Cognitive Control Training.mp. | 35 |
| 24 | mbct.mp. | 634 |
| 25 | cnt.mp. | 104 |
| 26 | Concreteness training.mp. | 12 |
| 27 | mct.mp. | 497 |
| 28 | meta cognitive therap*.mp. | 22 |
| 29 | metacognitive therap*.mp. | 233 |
| 30 | rfcbt.mp. | 4 |
| 31 | rf cbt.mp. | 0 |
| 32 | perseverative thinking.mp. | 162 |
| 33 | rnt.mp. | 85 |
| 34 | repetitive negative thinking.mp. | 134 |
| 35 | worries.mp. | 3578 |
| 36 | worry.mp. | 9995 |
| 37 | 12 or 13 or 14 or 15 or 16 or 17 or 18 or 19 or 20 or 21 or 22 or 23 or 24 or 25 or 26 or 27 or 28 or 29 or 30 or 31 or 32 or 33 or 34 or 35 or 36 | 33098 |
| 38 | 8 and 37 | 8944 |
| 39 | limit 38 to ("0830 systematic review" or 1200 meta analysis) | 269 |
| 40 | 11 and 38 | 682 |
| 41 | 39 or 40 | 689 |
| 42 | limit 41 to yr="2009 - 2019" | 635 |
| 43 | limit 42 to (danish or english or norwegian or swedish) | 559 |

## CINAHL

Date of search: 04.09.2019

| **#** | **Query** | **Limiters/Expanders** | **Results** |
| --- | --- | --- | --- |
| S41 | S13 AND S38 | Limiters - Published Date: 20090101-20191231; Language: Danish, English, Norwegian, Swedish  Expanders - Apply equivalent subjects  Search modes - Boolean/Phrase | 330 |
| S40 | S13 AND S38 | Limiters - Published Date: 20090101-20191231  Expanders - Apply equivalent subjects  Search modes - Boolean/Phrase | 346 |
| S39 | S13 AND S38 | Expanders - Apply equivalent subjects  Search modes - Boolean/Phrase | 377 |
| S38 | S7 AND S37 | Expanders - Apply equivalent subjects  Search modes - Boolean/Phrase | 2,832 |
| S37 | S14 OR S15 OR S16 OR S17 OR S18 OR S19 OR S20 OR S21 OR S22 OR S23 OR S24 OR S25 OR S26 OR S27 OR S28 OR S29 OR S30 OR S31 OR S32 OR S33 OR S34 OR S35 OR S36 | Expanders - Apply equivalent subjects  Search modes - Boolean/Phrase | 16,951 |
| S36 | (MH "Mindfulness") | Expanders - Apply equivalent subjects  Search modes - Boolean/Phrase | 3,877 |
| S35 | "worries" | Expanders - Apply equivalent subjects  Search modes - Boolean/Phrase | 2,220 |
| S34 | worry | Expanders - Apply equivalent subjects  Search modes - Boolean/Phrase | 6,713 |
| S33 | "repetitive negative thinking" | Expanders - Apply equivalent subjects  Search modes - Boolean/Phrase | 41 |
| S32 | rnt | Expanders - Apply equivalent subjects  Search modes - Boolean/Phrase | 39 |
| S31 | "perseverative thinking" | Expanders - Apply equivalent subjects  Search modes - Boolean/Phrase | 20 |
| S30 | "rf cbt" | Expanders - Apply equivalent subjects  Search modes - Boolean/Phrase | 0 |
| S29 | rfcbt | Expanders - Apply equivalent subjects  Search modes - Boolean/Phrase | 2 |
| S28 | "metacognitive therap*" | Expanders - Apply equivalent subjects  Search modes - Boolean/Phrase | 84 |
| S27 | "meta cognitive therap*" | Expanders - Apply equivalent subjects  Search modes - Boolean/Phrase | 8 |
| S26 | mct | Expanders - Apply equivalent subjects  Search modes - Boolean/Phrase | 629 |
| S25 | "Concreteness training" | Expanders - Apply equivalent subjects  Search modes - Boolean/Phrase | 2 |
| S24 | cnt | Expanders - Apply equivalent subjects  Search modes - Boolean/Phrase | 131 |
| S23 | mbct | Expanders - Apply equivalent subjects  Search modes - Boolean/Phrase | 180 |
| S22 | "Cognitive Control Training" | Expanders - Apply equivalent subjects  Search modes - Boolean/Phrase | 12 |
| S21 | cct | Expanders - Apply equivalent subjects  Search modes - Boolean/Phrase | 1,015 |
| S20 | "attention bias modification" | Expanders - Apply equivalent subjects  Search modes - Boolean/Phrase | 75 |
| S19 | abm | Expanders - Apply equivalent subjects  Search modes - Boolean/Phrase | 298 |
| S18 | "attentional bias modification" | Expanders - Apply equivalent subjects  Search modes - Boolean/Phrase | 36 |
| S17 | "cognitive bias modification" | Expanders - Apply equivalent subjects  Search modes - Boolean/Phrase | 139 |
| S16 | cbm | Expanders - Apply equivalent subjects  Search modes - Boolean/Phrase | 682 |
| S15 | rumination* | Expanders - Apply equivalent subjects  Search modes - Boolean/Phrase | 1,340 |
| S14 | Mindfulness | Expanders - Apply equivalent subjects  Search modes - Boolean/Phrase | 6,207 |
| S13 | S8 OR S9 OR S10 OR S11 OR S12 | Search modes - Boolean/Phrase | 307,414 |
| S12 | (pooled N1 (data or analys*)) | Search modes - Boolean/Phrase | 7,715 |
| S11 | (((systematic or method* or rapid or integrative) N3 (review* or overview* or study or studies or search* or approach*)) or meta analy* or meta-analy* or metaanaly*) | Search modes - Boolean/Phrase | 296,984 |
| S10 | (MH "Meta Analysis") | Search modes - Boolean/Phrase | 39,696 |
| S9 | (MH "Systematic Review") | Search modes - Boolean/Phrase | 73,067 |
| S8 | PT (Systematic Review or Meta Analysis) | Search modes - Boolean/Phrase | 86,925 |
| S7 | S1 OR S2 OR S3 OR S4 OR S5 OR S6 | Search modes - Boolean/Phrase | 154,397 |
| S6 | (MH "Affective Disorders+") | Search modes - Boolean/Phrase | 104,776 |
| S5 | trd | Search modes - Boolean/Phrase | 263 |
| S4 | "affective disorder*" | Search modes - Boolean/Phrase | 9,203 |
| S3 | depression | Search modes - Boolean/Phrase | 146,594 |
| S2 | "depressive disorder*" | Search modes - Boolean/Phrase | 9,229 |
| S1 | mdd | Search modes - Boolean/Phrase | 3,165 |

## The Cochrane library

Date of search: 04.09.2019


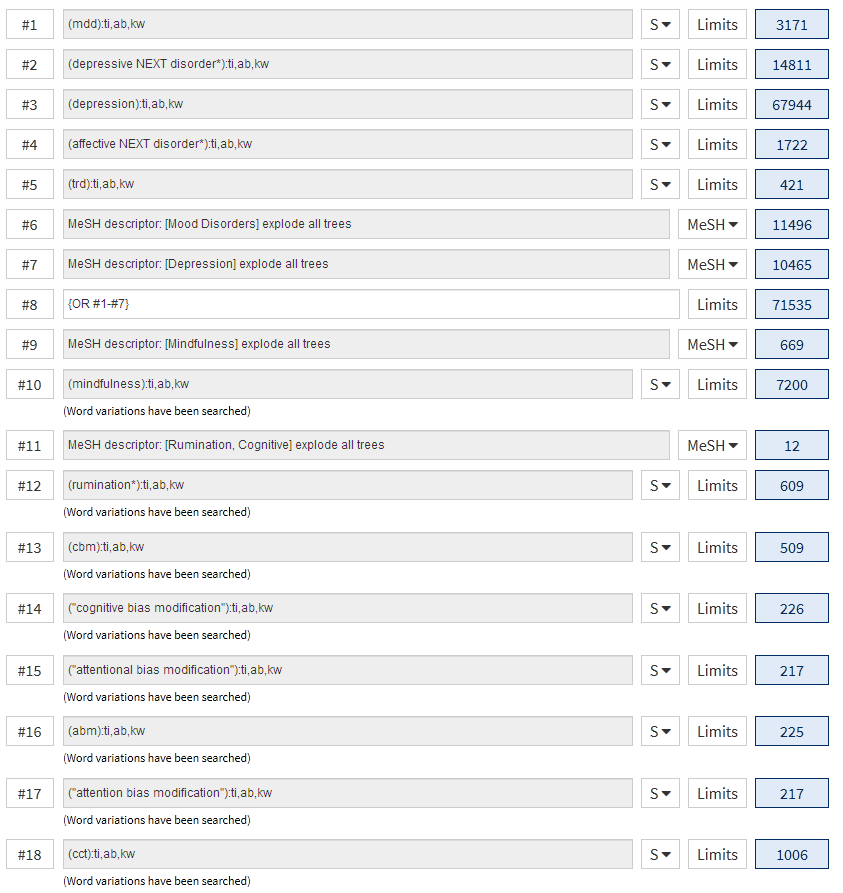


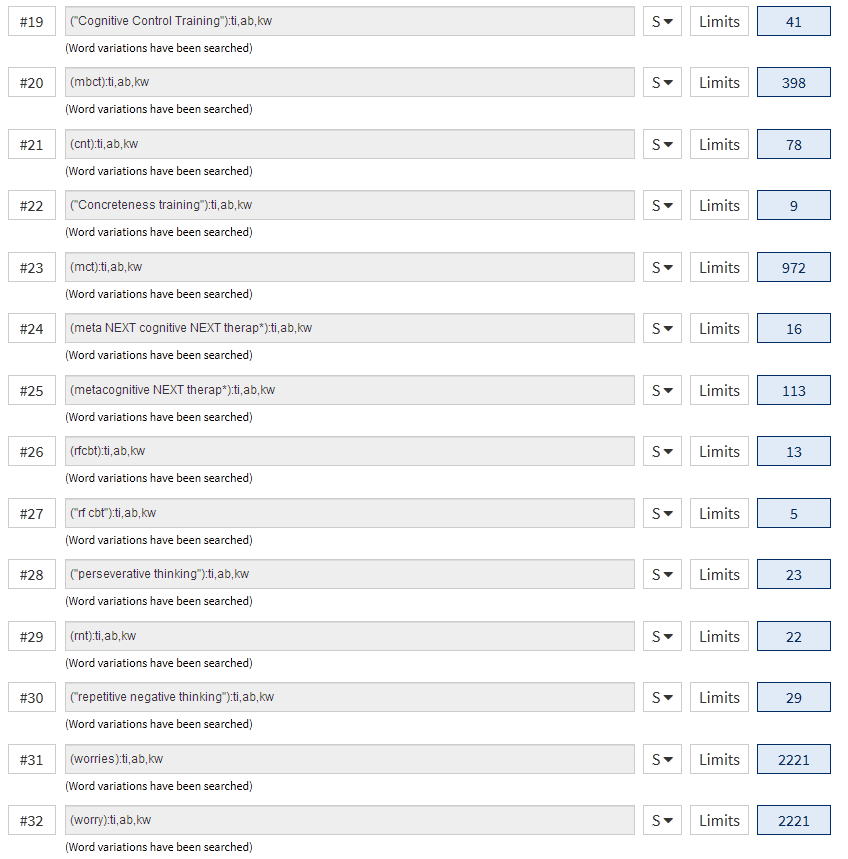


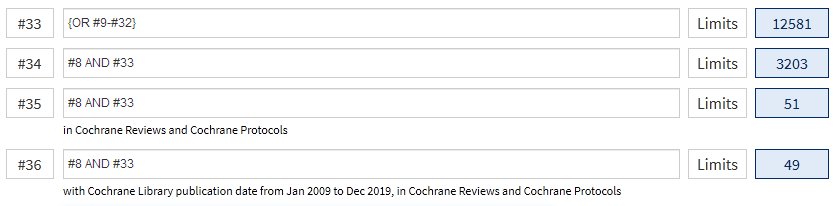


**References in total: 1925. After deduplication: 1192.**

# PICO 6 (cognitive remediation)

## PubMed

Date of search: 29.08.2019

| **Query** | **Items found** |
| --- | --- |
| Search **(((((((((((("Cognitive remediation") OR "Cognitive training") OR "Cognitive rehabilitation") OR "Cognitive enhancement") OR "Cognition training") OR "Cognition" "remediation") OR "Cognition"[tiab] "rehabilitation"[tiab]) OR "Cognition enhancement") OR "Cognitive Remediation"[Mesh])) AND (((((((mdd) OR depressive disorder*) OR "depression") OR affective disorder*) OR trd) OR "Mood Disorders"[Mesh]) OR "Depression"[Mesh]))) AND (((((((("Systematic Review" [Publication Type] OR systematic[sb] OR "Meta-Analysis" [Publication Type]))) OR ((((meta analy* OR metaanaly* OR "pubmed" OR "medline" OR "embase" OR "cochrane"))) OR (("systematic"[Title/Abstract]) AND (review*[Title/Abstract] OR "study"[Title/Abstract] OR "studies"[Title/Abstract] OR search*[Title/Abstract])))) OR "cochrane database syst rev"[Journal]))))** Filters: **Publication date from 2009/01/01 to 2019/12/31; English; Danish; Norwegian; Swedish** | [18](https://www.ncbi.nlm.nih.gov/pubmed/?cmd=HistorySearch&querykey=28) |
| Search **(((((((((((("Cognitive remediation") OR "Cognitive training") OR "Cognitive rehabilitation") OR "Cognitive enhancement") OR "Cognition training") OR "Cognition" "remediation") OR "Cognition"[tiab] "rehabilitation"[tiab]) OR "Cognition enhancement") OR "Cognitive Remediation"[Mesh])) AND (((((((mdd) OR depressive disorder*) OR "depression") OR affective disorder*) OR trd) OR "Mood Disorders"[Mesh]) OR "Depression"[Mesh]))) AND (((((((("Systematic Review" [Publication Type] OR systematic[sb] OR "Meta-Analysis" [Publication Type]))) OR ((((meta analy* OR metaanaly* OR "pubmed" OR "medline" OR "embase" OR "cochrane"))) OR (("systematic"[Title/Abstract]) AND (review*[Title/Abstract] OR "study"[Title/Abstract] OR "studies"[Title/Abstract] OR search*[Title/Abstract])))) OR "cochrane database syst rev"[Journal]))))** Filters: **Publication date from 2009/01/01 to 2019/12/31** | [21](https://www.ncbi.nlm.nih.gov/pubmed/?cmd=HistorySearch&querykey=24) |
| Search **(((((((((((("Cognitive remediation") OR "Cognitive training") OR "Cognitive rehabilitation") OR "Cognitive enhancement") OR "Cognition training") OR "Cognition" "remediation") OR "Cognition"[tiab] "rehabilitation"[tiab]) OR "Cognition enhancement") OR "Cognitive Remediation"[Mesh])) AND (((((((mdd) OR depressive disorder*) OR "depression") OR affective disorder*) OR trd) OR "Mood Disorders"[Mesh]) OR "Depression"[Mesh]))) AND (((((((("Systematic Review" [Publication Type] OR systematic[sb] OR "Meta-Analysis" [Publication Type]))) OR ((((meta analy* OR metaanaly* OR "pubmed" OR "medline" OR "embase" OR "cochrane"))) OR (("systematic"[Title/Abstract]) AND (review*[Title/Abstract] OR "study"[Title/Abstract] OR "studies"[Title/Abstract] OR search*[Title/Abstract])))) OR "cochrane database syst rev"[Journal]))))** | [23](https://www.ncbi.nlm.nih.gov/pubmed/?cmd=HistorySearch&querykey=23) |
| Search **((((((("Systematic Review" [Publication Type] OR systematic[sb] OR "Meta-Analysis" [Publication Type]))) OR ((((meta analy* OR metaanaly* OR "pubmed" OR "medline" OR "embase" OR "cochrane"))) OR (("systematic"[Title/Abstract]) AND (review*[Title/Abstract] OR "study"[Title/Abstract] OR "studies"[Title/Abstract] OR search*[Title/Abstract])))) OR "cochrane database syst rev"[Journal])))** | [448186](https://www.ncbi.nlm.nih.gov/pubmed/?cmd=HistorySearch&querykey=22) |
| Search **(((((((((("Cognitive remediation") OR "Cognitive training") OR "Cognitive rehabilitation") OR "Cognitive enhancement") OR "Cognition training") OR "Cognition" "remediation") OR "Cognition"[tiab] "rehabilitation"[tiab]) OR "Cognition enhancement") OR "Cognitive Remediation"[Mesh])) AND (((((((mdd) OR depressive disorder*) OR "depression") OR affective disorder*) OR trd) OR "Mood Disorders"[Mesh]) OR "Depression"[Mesh])** | [315](https://www.ncbi.nlm.nih.gov/pubmed/?cmd=HistorySearch&querykey=21) |
| Search **(((((((("Cognitive remediation") OR "Cognitive training") OR "Cognitive rehabilitation") OR "Cognitive enhancement") OR "Cognition training") OR "Cognition" "remediation") OR "Cognition"[tiab] "rehabilitation"[tiab]) OR "Cognition enhancement") OR "Cognitive Remediation"[Mesh]** | [2423](https://www.ncbi.nlm.nih.gov/pubmed/?cmd=HistorySearch&querykey=20) |
| Search **"Cognitive Remediation"[Mesh]** | [221](https://www.ncbi.nlm.nih.gov/pubmed/?cmd=HistorySearch&querykey=19) |
| Search **"Cognition enhancement"** | [89](https://www.ncbi.nlm.nih.gov/pubmed/?cmd=HistorySearch&querykey=18) |
| Search **"Cognition"[tiab] "rehabilitation"[tiab]** | [1959](https://www.ncbi.nlm.nih.gov/pubmed/?cmd=HistorySearch&querykey=17) |
| Search **"Cognition" "remediation"** | [986](https://www.ncbi.nlm.nih.gov/pubmed/?cmd=HistorySearch&querykey=16) |
| Search **"Cognition training"** | [45](https://www.ncbi.nlm.nih.gov/pubmed/?cmd=HistorySearch&querykey=15) |
| Search **"Cognitive enhancement"** | [1067](https://www.ncbi.nlm.nih.gov/pubmed/?cmd=HistorySearch&querykey=14) |
| Search **"Cognitive rehabilitation"** | [1685](https://www.ncbi.nlm.nih.gov/pubmed/?cmd=HistorySearch&querykey=13) |
| Search **"Cognitive training"** | [2387](https://www.ncbi.nlm.nih.gov/pubmed/?cmd=HistorySearch&querykey=12) |
| Search **"Cognitive remediation"** | [1146](https://www.ncbi.nlm.nih.gov/pubmed/?cmd=HistorySearch&querykey=11) |
| Search **((((((mdd) OR depressive disorder*) OR "depression") OR affective disorder*) OR trd) OR "Mood Disorders"[Mesh]) OR "Depression"[Mesh]** | [433402](https://www.ncbi.nlm.nih.gov/pubmed/?cmd=HistorySearch&querykey=10) |
| Search **"Depression"[Mesh]** | [111174](https://www.ncbi.nlm.nih.gov/pubmed/?cmd=HistorySearch&querykey=9) |
| Search **"Mood Disorders"[Mesh]** | [117352](https://www.ncbi.nlm.nih.gov/pubmed/?cmd=HistorySearch&querykey=8) |
| Search **trd** | [1426](https://www.ncbi.nlm.nih.gov/pubmed/?cmd=HistorySearch&querykey=5) |
| Search **affective disorder*** | [19328](https://www.ncbi.nlm.nih.gov/pubmed/?cmd=HistorySearch&querykey=4) |
| Search **"depression"** | [381063](https://www.ncbi.nlm.nih.gov/pubmed/?cmd=HistorySearch&querykey=3) |
| Search **depressive disorder*** | [111902](https://www.ncbi.nlm.nih.gov/pubmed/?cmd=HistorySearch&querykey=2) |
| Search **mdd** | [11987](https://www.ncbi.nlm.nih.gov/pubmed/?cmd=HistorySearch&querykey=1) |

## Embase

Date of search: 29.08.2019

| **#** | **Searches** | **Results** |
| --- | --- | --- |
| 1 | mdd.mp. | 18081 |
| 2 | depressive disorder*.mp. | 50618 |
| 3 | depression.mp. | 638277 |
| 4 | affective disorder*.mp. | 24480 |
| 5 | trd.mp. | 2294 |
| 6 | exp mood disorder/ | 488558 |
| 7 | 1 or 2 or 3 or 4 or 5 or 6 | 717829 |
| 8 | ((systematic adj3 (review* or study or studies or search*)) or meta analy* or meta-analy* or metaanaly*).ti,ab,kw. | 352191 |
| 9 | Cochrane.jx. | 20554 |
| 10 | 8 or 9 | 366615 |
| 11 | Cognitive remediation.mp. | 2129 |
| 12 | Cognitive training.mp. | 3505 |
| 13 | Cognitive rehabilitation.mp. | 3766 |
| 14 | Cognitive enhancement.mp. | 1463 |
| 15 | Cognition training.mp. | 86 |
| 16 | Cognition remediation.mp. | 13 |
| 17 | Cognition rehabilitation.mp. | 14 |
| 18 | Cognition enhancement.mp. | 136 |
| 19 | cognitive remediation therapy/ | 882 |
| 20 | cognitive rehabilitation/ | 2684 |
| 21 | 11 or 12 or 13 or 14 or 15 or 16 or 17 or 18 or 19 or 20 | 9966 |
| 22 | 7 and 21 | 1696 |
| 23 | limit 22 to (meta analysis or "systematic review") | 108 |
| 24 | 10 and 22 | 117 |
| 25 | 23 or 24 | 138 |
| 26 | 25 not Conference Abstract.pt. | 115 |
| 27 | limit 26 to yr="2009 - 2019" | 105 |
| 28 | limit 27 to (danish or english or norwegian or swedish) | 100 |

## PsycInfo

Date of search: 29.08.2019

| **#** | **Searches** | **Results** |
| --- | --- | --- |
| 1 | mdd.mp. | 9805 |
| 2 | depressive disorder*.mp. | 74568 |
| 3 | depression.mp. | 313928 |
| 4 | affective disorder*.mp. | 33472 |
| 5 | trd.mp. | 683 |
| 6 | exp affective disorders/ | 136494 |
| 7 | "depression (emotion)"/ | 25047 |
| 8 | 1 or 2 or 3 or 4 or 5 or 6 or 7 | 341728 |
| 9 | (((systematic or method* or rapid or integrative) adj3 (review* or overview* or study or studies or search* or approach*)) or meta analy* or meta-analy* or metaanaly*).ti,ab,id. | 179337 |
| 10 | (pooled adj1 (data or analys*)).ti,ab. | 1792 |
| 11 | 9 or 10 | 180602 |
| 12 | Cognitive remediation.mp. | 1276 |
| 13 | Cognitive training.mp. | 2312 |
| 14 | Cognitive rehabilitation.mp. | 2978 |
| 15 | Cognitive enhancement.mp. | 948 |
| 16 | Cognition training.mp. | 52 |
| 17 | Cognition remediation.mp. | 7 |
| 18 | Cognition rehabilitation.mp. | 6 |
| 19 | Cognition enhancement.mp. | 56 |
| 20 | exp brain training/ | 1602 |
| 21 | cognitive rehabilitation/ | 2250 |
| 22 | 12 or 13 or 14 or 15 or 16 or 17 or 18 or 19 or 20 or 21 | 7740 |
| 23 | 8 and 22 | 1075 |
| 24 | limit 23 to ("0830 systematic review" or 1200 meta analysis) | 32 |
| 25 | 11 and 23 | 87 |
| 26 | 24 or 25 | 90 |
| 27 | limit 26 to yr="2009 - 2019" | 82 |
| 28 | limit 27 to (danish or english or norwegian or swedish) | 73 |

## CINAHL

Date of search: 29.08.2019

| **#** | **Query** | **Limiters/Expanders** | **Results** |
| --- | --- | --- | --- |
| S28 | S13 AND S25 | Limiters - Published Date: 20090101-20191231; Language: Danish, English, Norwegian, Swedish  Expanders - Apply equivalent subjects  Search modes - Boolean/Phrase | 36 |
| S27 | S13 AND S25 | Limiters - Published Date: 20090101-20191231  Expanders - Apply equivalent subjects  Search modes - Boolean/Phrase | 39 |
| S26 | S13 AND S25 | Expanders - Apply equivalent subjects  Search modes - Boolean/Phrase | 44 |
| S25 | S7 AND S24 | Expanders - Apply equivalent subjects  Search modes - Boolean/Phrase | 333 |
| S24 | S14 OR S15 OR S16 OR S17 OR S18 OR S19 OR S20 OR S21 OR S22 OR S23 | Expanders - Apply equivalent subjects  Search modes - Boolean/Phrase | 3,650 |
| S23 | (MH "Rehabilitation, Cognitive") | Expanders - Apply equivalent subjects  Search modes - Boolean/Phrase | 1,873 |
| S22 | (MH "Cognitive Remediation") | Expanders - Apply equivalent subjects  Search modes - Boolean/Phrase | 77 |
| S21 | "Cognition enhancement" | Expanders - Apply equivalent subjects  Search modes - Boolean/Phrase | 15 |
| S20 | "Cognition rehabilitation" | Expanders - Apply equivalent subjects  Search modes - Boolean/Phrase | 3 |
| S19 | "Cognition remediation" | Expanders - Apply equivalent subjects  Search modes - Boolean/Phrase | 1 |
| S18 | "Cognition training" | Expanders - Apply equivalent subjects  Search modes - Boolean/Phrase | 20 |
| S17 | "Cognitive enhancement" | Expanders - Apply equivalent subjects  Search modes - Boolean/Phrase | 279 |
| S16 | "Cognitive rehabilitation" | Expanders - Apply equivalent subjects  Search modes - Boolean/Phrase | 1,774 |
| S15 | "Cognitive training" | Expanders - Apply equivalent subjects  Search modes - Boolean/Phrase | 924 |
| S14 | "Cognitive remediation" | Expanders - Apply equivalent subjects  Search modes - Boolean/Phrase | 491 |
| S13 | S8 OR S9 OR S10 OR S11 OR S12 | Search modes - Boolean/Phrase | 306,920 |
| S12 | (pooled N1 (data or analys*)) | Search modes - Boolean/Phrase | 7,695 |
| S11 | (((systematic or method* or rapid or integrative) N3 (review* or overview* or study or studies or search* or approach*)) or meta analy* or meta-analy* or metaanaly*) | Search modes - Boolean/Phrase | 296,497 |
| S10 | (MH "Meta Analysis") | Search modes - Boolean/Phrase | 39,617 |
| S9 | (MH "Systematic Review") | Search modes - Boolean/Phrase | 72,979 |
| S8 | PT (Systematic Review or Meta Analysis) | Search modes - Boolean/Phrase | 86,928 |
| S7 | S1 OR S2 OR S3 OR S4 OR S5 OR S6 | Search modes - Boolean/Phrase | 154,135 |
| S6 | (MH "Affective Disorders+") | Search modes - Boolean/Phrase | 104,628 |
| S5 | trd | Search modes - Boolean/Phrase | 263 |
| S4 | "affective disorder*" | Search modes - Boolean/Phrase | 9,180 |
| S3 | depression | Search modes - Boolean/Phrase | 146,358 |
| S2 | "depressive disorder*" | Search modes - Boolean/Phrase | 9,186 |
| S1 | mdd | Search modes - Boolean/Phrase | 3,140 |

## The Cochrane library

Date of search: 29.08.2019


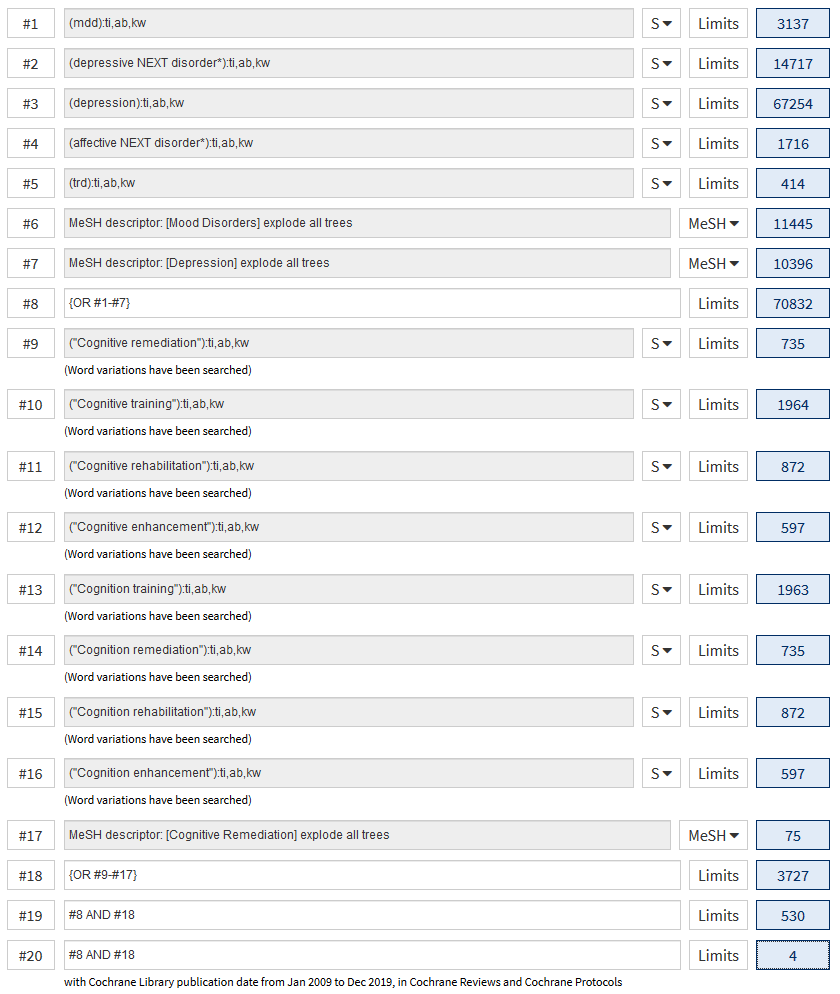


**References in total: 231. After deduplication: 177.**
